# Supplementary material for: Gas electron diffraction then and now: from trisilyl phosphine to iso-propyl(tert-butyl)(trichlorosilyl)phosphine
Source: Royal Society of Chemistry journal article supplement (doi:10.1039/d1dt02888j), 2021-01-01
Supplement: d1dt02888j1.pdf [file d1dt02888j1.pdf]

## **Gas Electron Diffraction Then and Now: from trisilyl phosphine to *iso*-propyl(*tert*-butyl)(trichlorosilyl)phosphine**

### **Authors**

Isabella Wagner,<sup>a</sup> David W. H. Rankin<sup>b</sup> and Sarah L. Masters<sup>a</sup>

### **Affiliations**

<sup>a</sup> School of Physical and Chemical Sciences, University of Canterbury, Private Bag 4100, Christchurch 8140, New Zealand

<sup>b</sup> School of Chemistry, The University of Edinburgh, Joseph Black Building, David Brewster Road, Edinburgh, EH9 3FJ, UK

### **Supporting Information**

**Table S1.** Nozzle-to-plate distances (mm), weighting functions ( $\text{nm}^{-1}$ ), and electron wavelengths ( $\mu\text{m}$ ) used in the electron-diffraction study.

| Nozzle-to-plate distances <sup>a</sup> | $\Delta s$ | $s_{\text{min}}$ | $sw_1$ | $sw_2$ | $s_{\text{max}}$ | Electron wavelength |
|----------------------------------------|------------|------------------|--------|--------|------------------|---------------------|
| 256.73                                 | 2          | 20               | 40     | 104    | 120              | 6.020               |
| 94.32                                  | 4          | 84               | 104    | 256    | 300              | 6.020               |

<sup>a</sup> Determined by reference to the scattering pattern of benzene vapour.

**Table S2.** Calculated coordinates at the B3LYP-D3/Def2TZVP level for conformer +77+.<sup>a</sup>

| Atom  | x      | y      | z      |
|-------|--------|--------|--------|
| P(1)  | -85.2  | 27.2   | -82.4  |
| Si(2) | 119.9  | -24.3  | -5.8   |
| C(3)  | -126.7 | 193.3  | -1.6   |
| C(4)  | -206.0 | -98.2  | -3.8   |
| Cl(5) | 243.9  | 135.5  | -48.4  |
| Cl(6) | 191.5  | -187.2 | -110.0 |
| Cl(7) | 143.6  | -68.2  | 195.3  |
| C(8)  | -95.4  | 306.3  | -100.6 |
| C(9)  | -68.7  | 225.0  | 136.7  |
| H(10) | -235.5 | 186.4  | 7.9    |
| C(11) | -154.7 | -240.0 | -33.0  |
| C(12) | -339.1 | -77.4  | -78.6  |
| C(13) | -229.8 | -82.1  | 146.7  |
| H(14) | 12.1   | 315.0  | -117.5 |
| H(15) | -130.4 | 401.8  | -60.4  |
| H(16) | -143.3 | 290.2  | -197.2 |
| H(17) | 39.0   | 241.7  | 131.3  |
| H(18) | -86.7  | 146.1  | 209.3  |
| H(19) | -113.7 | 316.9  | 175.1  |
| H(20) | -327.8 | -94.0  | -185.9 |
| H(21) | -379.4 | 23.0   | -63.9  |
| H(22) | -413.4 | -148.2 | -40.9  |
| H(23) | -138.1 | -94.3  | 204.2  |
| H(24) | -300.7 | -158.4 | 180.2  |
| H(25) | -273.1 | 15.0   | 171.0  |
| H(26) | -129.8 | -253.7 | -138.3 |
| H(27) | -232.5 | -312.5 | -7.3   |
| H(28) | -66.4  | -264.7 | 26.1   |

<sup>a</sup> Coordinates are given in pm.

**Table S3.** Calculated coordinates at the B3LYP-D3/Def2TZVP level for conformer +51--.<sup>a</sup>

| Atom  | x      | y      | z      |
|-------|--------|--------|--------|
| P(1)  | -81.0  | 30.8   | -89.3  |
| Si(2) | 118.4  | -27.8  | -2.0   |
| C(3)  | -115.8 | 204.2  | -22.1  |
| C(4)  | -208.9 | -87.9  | -9.7   |
| Cl(5) | 264.6  | 84.0   | -95.4  |
| Cl(6) | 154.6  | -226.3 | -46.5  |
| Cl(7) | 150.6  | -7.1   | 201.6  |
| C(8)  | -23.7  | 306.0  | -90.9  |
| C(9)  | -118.7 | 227.2  | 129.0  |
| H(10) | -216.7 | 220.8  | -61.2  |
| C(11) | -213.4 | -212.0 | -100.9 |
| C(12) | -345.8 | -18.2  | -16.2  |
| C(13) | -180.4 | -132.6 | 134.3  |
| H(14) | 78.2   | 300.1  | -52.6  |
| H(15) | -60.4  | 407.1  | -71.6  |
| H(16) | -19.8  | 291.3  | -198.9 |
| H(17) | -20.1  | 213.6  | 173.3  |
| H(18) | -187.8 | 160.5  | 180.3  |
| H(19) | -150.7 | 329.8  | 149.7  |
| H(20) | -368.3 | 18.2   | -116.7 |
| H(21) | -353.4 | 65.5   | 53.2   |
| H(22) | -423.5 | -90.3  | 10.9   |
| H(23) | -89.7  | -192.8 | 140.9  |
| H(24) | -263.1 | -194.8 | 169.9  |
| H(25) | -169.9 | -48.8  | 202.9  |
| H(26) | -239.1 | -185.3 | -203.5 |
| H(27) | -289.4 | -281.3 | -63.7  |
| H(28) | -118.2 | -265.0 | -102.5 |

<sup>a</sup> Coordinates are given in pm.

**Table S4.** Calculated coordinates at the B3LYP-D3/Def2TZVP level for conformer -91(-).<sup>a</sup>

| Atom  | x      | y      | z      |
|-------|--------|--------|--------|
| P(1)  | 78.7   | -12.0  | -83.6  |
| Si(2) | -132.3 | -1.8   | -7.1   |
| C(3)  | 131.5  | -179.8 | -13.0  |
| C(4)  | 175.2  | 130.3  | -0.1   |
| Cl(5) | -232.4 | -159.6 | -95.2  |
| Cl(6) | -221.6 | 173.7  | -68.6  |
| Cl(7) | -167.8 | -17.3  | 196.5  |
| C(8)  | 159.2  | -192.5 | 137.1  |
| C(9)  | 248.1  | -236.2 | -95.7  |
| H(10) | 43.8   | -241.1 | -36.2  |
| C(11) | 144.8  | 256.1  | -83.6  |
| C(12) | 324.9  | 97.6   | -14.2  |
| C(13) | 142.3  | 158.6  | 147.0  |
| H(14) | 248.6  | -137.4 | 166.4  |
| H(15) | 176.7  | -297.6 | 161.9  |
| H(16) | 76.0   | -157.4 | 197.8  |
| H(17) | 340.5  | -181.1 | -78.2  |
| H(18) | 226.7  | -233.3 | -202.6 |
| H(19) | 266.1  | -340.3 | -67.6  |
| H(20) | 351.9  | 73.8   | -117.3 |
| H(21) | 355.2  | 14.5   | 49.3   |
| H(22) | 383.3  | 185.0  | 16.0   |
| H(23) | 39.7   | 193.0  | 159.9  |
| H(24) | 208.0  | 238.1  | 183.8  |
| H(25) | 156.7  | 71.5   | 210.6  |
| H(26) | 171.2  | 242.1  | -188.5 |
| H(27) | 203.3  | 339.9  | -44.6  |
| H(28) | 39.6   | 284.0  | -78.6  |

<sup>a</sup> Coordinates are given in pm.

**Table S5.** Calculated coordinates at the B3LYP-D3/Def2TZVP level for conformer +143--.<sup>a</sup>

| Atom  | x      | y      | z      |
|-------|--------|--------|--------|
| P(1)  | 87.9   | 24.0   | 75.9   |
| Si(2) | -125.1 | -10.4  | 7.2    |
| C(3)  | 139.8  | 177.7  | -22.9  |
| C(4)  | 186.5  | -121.0 | -3.0   |
| Cl(5) | -247.2 | 123.0  | 106.5  |
| Cl(6) | -189.3 | -199.5 | 59.7   |
| Cl(7) | -164.8 | 10.5   | -195.3 |
| C(8)  | 259.9  | 243.3  | 47.3   |
| C(9)  | 29.1   | 282.6  | -38.1  |
| H(10) | 169.8  | 144.1  | -122.5 |
| C(11) | 170.9  | -242.2 | 90.4   |
| C(12) | 335.2  | -81.9  | -5.6   |
| C(13) | 143.1  | -158.7 | -145.2 |
| H(14) | 230.1  | 282.3  | 144.9  |
| H(15) | 295.9  | 327.2  | -12.7  |
| H(16) | 343.5  | 175.5  | 63.0   |
| H(17) | -11.8  | 311.8  | 58.8   |
| H(18) | -53.1  | 248.9  | -100.9 |
| H(19) | 70.8   | 372.3  | -84.6  |
| H(20) | 371.5  | -51.9  | 92.9   |
| H(21) | 355.7  | -1.7   | -76.4  |
| H(22) | 393.5  | -168.9 | -37.1  |
| H(23) | 43.2   | -202.2 | -147.5 |
| H(24) | 211.9  | -233.5 | -185.8 |
| H(25) | 144.0  | -73.0  | -212.7 |
| H(26) | 205.9  | -219.4 | 191.2  |
| H(27) | 230.9  | -325.2 | 51.8   |
| H(28) | 67.9   | -276.4 | 97.2   |

<sup>a</sup> Coordinates are given in pm.

**Table S6.** Calculated coordinates at the B3LYP-D3/Def2TZVP level for conformer +165+-.<sup>a</sup>

| Atom  | x      | y      | z      |
|-------|--------|--------|--------|
| P(1)  | -82.5  | 22.6   | -79.8  |
| Si(2) | 128.3  | -12.2  | -3.6   |
| C(3)  | -129.0 | 177.5  | 20.2   |
| C(4)  | -190.6 | -118.0 | -4.1   |
| Cl(5) | 254.7  | 126.3  | -90.4  |
| Cl(6) | 206.5  | -194.9 | -58.7  |
| Cl(7) | 148.1  | 5.6    | 202.0  |
| C(8)  | -273.2 | 219.2  | -12.1  |
| C(9)  | -34.7  | 295.0  | -8.2   |
| H(10) | -122.4 | 153.0  | 126.4  |
| C(11) | -121.8 | -254.1 | -22.7  |
| C(12) | -320.4 | -120.4 | -87.4  |
| C(13) | -223.0 | -99.2  | 144.6  |
| H(14) | -286.2 | 237.2  | -119.1 |
| H(15) | -296.4 | 312.3  | 40.4   |
| H(16) | -346.8 | 145.4  | 19.0   |
| H(17) | -23.8  | 313.2  | -115.3 |
| H(18) | 64.6   | 280.3  | 33.6   |
| H(19) | -75.9  | 385.6  | 36.9   |
| H(20) | -299.3 | -142.4 | -192.1 |
| H(21) | -375.5 | -26.6  | -83.4  |
| H(22) | -386.1 | -199.0 | -48.9  |
| H(23) | -132.5 | -93.7  | 205.2  |
| H(24) | -281.4 | -184.9 | 179.7  |
| H(25) | -282.3 | -9.9   | 163.8  |
| H(26) | -83.5  | -267.9 | -123.9 |
| H(27) | -194.9 | -333.3 | -3.7   |
| H(28) | -39.5  | -268.4 | 47.0   |

<sup>a</sup> Coordinates are given in pm.

**Table S7.** Refined and calculated (B3LYP-D3/Def2TZVP) amplitudes of vibration ( $u$ ), associated  $r_a$  distances and corresponding correction values ( $k$ ) for the  $r_{hl}$  refinement of +77++.<sup>a,b</sup>

|          | Atom pair     | $r_a$    | $u_{GED}$              | $k$  | $u_{calc.}$ |
|----------|---------------|----------|------------------------|------|-------------|
| $u_1$    | C(9)-H(18)    | 108.6(4) | 8.3(6)                 | 0.4  | 7.6         |
| $u_2$    | C(13)-H(23)   | 108.6(4) | 8.3(Tied to $u_1$ )    | 0.4  | 7.6         |
| $u_3$    | C(13)-H(25)   | 108.6(4) | 8.3(Tied to $u_1$ )    | 0.4  | 7.7         |
| $u_4$    | C(11)-H(28)   | 108.6(4) | 8.3(Tied to $u_1$ )    | 0.4  | 7.7         |
| $u_5$    | C(8)-H(16)    | 108.6(4) | 8.3(Tied to $u_1$ )    | 0.4  | 7.7         |
| $u_6$    | C(9)-H(17)    | 108.6(4) | 8.3(Tied to $u_1$ )    | 0.4  | 7.7         |
| $u_7$    | C(12)-H(20)   | 108.6(4) | 8.3(Tied to $u_1$ )    | 0.4  | 7.7         |
| $u_8$    | C(11)-H(26)   | 108.6(4) | 8.3(Tied to $u_1$ )    | 0.4  | 7.7         |
| $u_9$    | C(8)-H(14)    | 108.6(4) | 8.3(Tied to $u_1$ )    | 0.4  | 7.7         |
| $u_{10}$ | C(12)-H(21)   | 108.6(4) | 8.4(Tied to $u_1$ )    | 0.4  | 7.7         |
| $u_{11}$ | C(8)-H(15)    | 108.6(4) | 8.4(Tied to $u_1$ )    | 0.4  | 7.7         |
| $u_{12}$ | C(11)-H(27)   | 108.6(4) | 8.4(Tied to $u_1$ )    | 0.4  | 7.7         |
| $u_{13}$ | C(9)-H(19)    | 108.6(4) | 8.4(Tied to $u_1$ )    | 0.4  | 7.7         |
| $u_{14}$ | C(12)-H(22)   | 108.6(4) | 8.4(Tied to $u_1$ )    | 0.4  | 7.7         |
| $u_{15}$ | C(13)-H(24)   | 108.6(4) | 8.4(Tied to $u_1$ )    | 0.4  | 7.7         |
| $u_{16}$ | C(3)-H(10)    | 108.6(4) | 8.4(Tied to $u_1$ )    | 0.4  | 7.8         |
| $u_{17}$ | C(4)-C(13)    | 153.1(2) | 4.4(3)                 | 0.2  | 5.3         |
| $u_{18}$ | C(3)-C(9)     | 153.1(2) | 4.4(Tied to $u_{17}$ ) | 0.1  | 5.3         |
| $u_{19}$ | C(3)-C(8)     | 153.1(2) | 4.4(Tied to $u_{17}$ ) | 0.2  | 5.3         |
| $u_{20}$ | C(4)-C(11)    | 153.1(2) | 4.4(Tied to $u_{17}$ ) | 0.2  | 5.3         |
| $u_{21}$ | C(4)-C(12)    | 153.1(2) | 4.5(Tied to $u_{17}$ ) | 0.2  | 5.3         |
| $u_{22}$ | H(17)...H(19) | 175.7(7) | 12.4(fixed)            | 0.0  | 12.4        |
| $u_{23}$ | H(24)...H(25) | 175.7(7) | 12.4(fixed)            | 0.0  | 12.4        |
| $u_{24}$ | H(27)...H(28) | 175.7(7) | 12.4(fixed)            | 0.0  | 12.4        |
| $u_{25}$ | H(21)...H(22) | 175.7(7) | 12.4(fixed)            | 0.0  | 12.4        |
| $u_{26}$ | H(17)...H(18) | 175.7(7) | 12.4(fixed)            | 0.0  | 12.4        |
| $u_{27}$ | H(14)...H(15) | 175.7(7) | 12.4(fixed)            | -0.1 | 12.4        |
| $u_{28}$ | H(18)...H(19) | 175.7(7) | 12.4(fixed)            | 0.0  | 12.4        |
| $u_{29}$ | H(23)...H(24) | 175.7(7) | 12.4(fixed)            | 0.0  | 12.4        |



|          |               |           |                         |      |      |
|----------|---------------|-----------|-------------------------|------|------|
| $u_{30}$ | H(14)...H(16) | 175.7(7)  | 12.4(fixed)             | 0.0  | 12.4 |
| $u_{31}$ | H(26)...H(28) | 175.7(7)  | 12.4(fixed)             | 0.0  | 12.4 |
| $u_{32}$ | H(26)...H(27) | 175.7(7)  | 12.4(fixed)             | 0.0  | 12.4 |
| $u_{33}$ | H(20)...H(21) | 175.7(7)  | 12.4(fixed)             | 0.0  | 12.4 |
| $u_{34}$ | H(23)...H(25) | 175.7(7)  | 12.3(fixed)             | 0.0  | 12.3 |
| $u_{35}$ | H(20)...H(22) | 175.7(7)  | 12.4(fixed)             | 0.0  | 12.4 |
| $u_{36}$ | H(15)...H(16) | 175.7(7)  | 12.4(fixed)             | -0.1 | 12.4 |
| $u_{37}$ | P(1)-C(3)     | 187.4(5)  | 5.1(5)                  | 0.2  | 5.9  |
| $u_{38}$ | P(1)-C(4)     | 189.1(5)  | 5.2(Tied to $u_{37}$ )  | 0.2  | 6.1  |
| $u_{39}$ | Si(2)-Cl(6)   | 204.0(1)  | 5.2(Tied to $u_{41}$ )  | 0.2  | 5.1  |
| $u_{40}$ | Si(2)-Cl(5)   | 204.0(1)  | 5.2(Tied to $u_{41}$ )  | 0.2  | 5.2  |
| $u_{41}$ | Si(2)-Cl(7)   | 204.0(1)  | 5.3(2)                  | 0.2  | 5.3  |
| $u_{42}$ | C(8)...H(10)  | 215.1(17) | 10.8(Tied to $u_{43}$ ) | 0.0  | 10.8 |
| $u_{43}$ | C(9)...H(10)  | 213.2(8)  | 10.8(12)                | 0.0  | 10.8 |
| $u_{44}$ | C(4)...H(24)  | 217.0(5)  | 11.5(Tied to $u_{54}$ ) | -0.2 | 10.8 |
| $u_{45}$ | C(4)...H(20)  | 217.0(5)  | 11.5(Tied to $u_{54}$ ) | -0.2 | 10.8 |
| $u_{46}$ | C(3)...H(19)  | 217.0(5)  | 11.6(Tied to $u_{54}$ ) | -0.2 | 10.9 |
| $u_{47}$ | C(4)...H(22)  | 217.0(5)  | 11.6(Tied to $u_{54}$ ) | -0.2 | 10.9 |
| $u_{48}$ | C(3)...H(15)  | 217.0(5)  | 11.6(Tied to $u_{54}$ ) | -0.2 | 10.9 |
| $u_{49}$ | C(3)...H(17)  | 217.0(5)  | 11.5(Tied to $u_{54}$ ) | -0.2 | 10.8 |
| $u_{50}$ | C(3)...H(14)  | 217.0(5)  | 11.5(Tied to $u_{54}$ ) | -0.1 | 10.8 |
| $u_{51}$ | C(4)...H(25)  | 217.0(5)  | 11.5(Tied to $u_{54}$ ) | -0.1 | 10.8 |
| $u_{52}$ | C(4)...H(23)  | 217.0(5)  | 11.3(Tied to $u_{54}$ ) | -0.1 | 10.7 |
| $u_{53}$ | C(3)...H(16)  | 217.0(5)  | 11.5(Tied to $u_{54}$ ) | -0.2 | 10.8 |
| $u_{54}$ | C(4)...H(20)  | 217.0(5)  | 11.5(11)                | -0.1 | 10.8 |
| $u_{55}$ | C(4)...H(26)  | 217.0(5)  | 11.5(Tied to $u_{54}$ ) | -0.2 | 10.8 |
| $u_{56}$ | C(4)...H(28)  | 217.0(5)  | 11.5(Tied to $u_{54}$ ) | -0.1 | 10.8 |
| $u_{57}$ | C(3)...H(18)  | 217.0(5)  | 11.5(Tied to $u_{54}$ ) | -0.1 | 10.8 |
| $u_{58}$ | C(4)...H(21)  | 217.0(5)  | 11.5(Tied to $u_{54}$ ) | -0.1 | 10.8 |
| $u_{59}$ | P(1)-Si(2)    | 225.5(6)  | 6.0(fixed)              | 0.3  | 6.0  |
| $u_{60}$ | H(10)...H(21) | 382.3(39) | 29.7(fixed)             | 6.8  | 29.7 |
| $u_{61}$ | H(11)...H(18) | 219.3(84) | 31.2(fixed)             | 7.0  | 31.2 |

|          |               |           |                        |      |      |
|----------|---------------|-----------|------------------------|------|------|
| $u_{62}$ | P(1)...H(10)  | 234.6(9)  | 11.9(fixed)            | 0.0  | 11.9 |
| $u_{63}$ | H(10)...H(25) | 234.3(51) | 32.0(fixed)            | 4.3  | 32.0 |
| $u_{64}$ | H(10)...H(19) | 304.3(9)  | 18.2(fixed)            | 0.4  | 18.2 |
| $u_{65}$ | H(18)...H(23) | 227.1(73) | 33.0(fixed)            | 8.0  | 33.0 |
| $u_{66}$ | H(22)...H(27) | 379.2(31) | 24.3(fixed)            | 3.0  | 24.3 |
| $u_{67}$ | H(10)...H(16) | 247.3(26) | 18.5(fixed)            | 0.3  | 18.5 |
| $u_{68}$ | H(22)...H(24) | 315.7(38) | 24.1(fixed)            | 2.7  | 24.1 |
| $u_{69}$ | H(10)...H(15) | 251.8(23) | 18.7(fixed)            | 0.2  | 18.7 |
| $u_{70}$ | C(11)...C(12) | 251.6(20) | 7.3(Tied to $u_{71}$ ) | -0.1 | 7.5  |
| $u_{71}$ | C(12)...C(13) | 249.6(9)  | 7.2(6)                 | 0.0  | 7.4  |
| $u_{72}$ | C(11)...C(13) | 249.6(9)  | 7.3(Tied to $u_{71}$ ) | -0.1 | 7.5  |
| $u_{73}$ | H(15)...H(19) | 302.7(40) | 24.7(fixed)            | 3.4  | 24.7 |
| $u_{74}$ | H(24)...H(27) | 375.1(19) | 24.7(fixed)            | 2.4  | 24.7 |
| $u_{75}$ | C(8)...C(9)   | 251.6(8)  | 7.3(Tied to $u_{71}$ ) | -0.1 | 7.6  |
| $u_{76}$ | H(10)...H(18) | 249.0(19) | 18.5(fixed)            | 0.1  | 18.5 |
| $u_{77}$ | H(23)...H(28) | 250.9(35) | 24.4(fixed)            | 2.3  | 24.4 |
| $u_{78}$ | H(21)...H(25) | 301.7(40) | 25.0(fixed)            | 2.5  | 25.0 |
| $u_{79}$ | H(20)...H(26) | 300.6(49) | 25.3(fixed)            | 2.6  | 25.3 |
| $u_{80}$ | H(14)...H(17) | 320.1(38) | 26.8(fixed)            | 2.8  | 26.8 |
| $u_{81}$ | C(12)...H(27) | 281.8(33) | 16.6(fixed)            | 0.3  | 16.6 |
| $u_{82}$ | C(13)...H(22) | 276.1(22) | 16.9(fixed)            | 0.3  | 16.9 |
| $u_{83}$ | C(11)...H(24) | 272.2(20) | 16.5(fixed)            | 0.2  | 16.5 |
| $u_{84}$ | C(9)...H(15)  | 272.6(20) | 17.3(fixed)            | 0.4  | 17.3 |
| $u_{85}$ | C(13)...H(28) | 269.0(21) | 17.0(fixed)            | 0.2  | 17.0 |
| $u_{86}$ | C(11)...H(20) | 274.7(34) | 17.3(fixed)            | 0.2  | 17.3 |
| $u_{87}$ | C(12)...H(24) | 276.8(20) | 16.4(fixed)            | 0.1  | 16.4 |
| $u_{88}$ | C(12)...H(25) | 271.5(22) | 16.3(fixed)            | 0.2  | 16.3 |
| $u_{89}$ | P(1)...C(12)  | 271.8(8)  | 8.1(6)                 | 0.0  | 8.3  |
| $u_{90}$ | C(11)...H(22) | 346.6(16) | 17.1(fixed)            | 0.1  | 17.1 |
| $u_{91}$ | C(8)...H(17)  | 278.2(20) | 17.9(fixed)            | 0.1  | 17.9 |
| $u_{92}$ | C(8)...H(19)  | 275.0(23) | 17.1(fixed)            | 0.1  | 17.1 |
| $u_{93}$ | C(13)...H(18) | 262.2(60) | 23.3(fixed)            | 6.0  | 23.3 |

|           |               |           |                        |      |      |
|-----------|---------------|-----------|------------------------|------|------|
| $u_{94}$  | C(13)...H(27) | 344.9(8)  | 17.2(fixed)            | 0.0  | 17.2 |
| $u_{95}$  | C(11)...H(23) | 276.1(22) | 16.3(fixed)            | 0.0  | 16.3 |
| $u_{96}$  | C(13)...H(21) | 272.2(20) | 17.5(fixed)            | 0.1  | 17.5 |
| $u_{97}$  | P(1)...C(8)   | 277.4(9)  | 8.2(Tied to $u_{89}$ ) | -0.2 | 8.4  |
| $u_{98}$  | C(12)...H(26) | 271.7(29) | 17.2(fixed)            | 0.0  | 17.2 |
| $u_{99}$  | P(1)...C(11)  | 277.8(8)  | 8.4(Tied to $u_{89}$ ) | 0.0  | 8.6  |
| $u_{100}$ | C(9)...H(14)  | 280.7(23) | 18.3(fixed)            | -0.1 | 18.3 |
| $u_{101}$ | Cl(7)...H(23) | 282.0(44) | 25.5(fixed)            | 7.2  | 25.5 |
| $u_{102}$ | C(4)...H(10)  | 285.5(23) | 18.4(fixed)            | 0.8  | 18.4 |
| $u_{103}$ | C(3)...H(25)  | 281.9(35) | 23.3(fixed)            | 2.7  | 23.3 |
| $u_{104}$ | P(1)...H(26)  | 375.4(9)  | 18.5(fixed)            | 0.5  | 18.5 |
| $u_{105}$ | P(1)...H(20)  | 286.1(23) | 18.4(fixed)            | 0.4  | 18.4 |
| $u_{106}$ | P(1)...C(13)  | 289.6(8)  | 7.8(Tied to $u_{89}$ ) | 0.0  | 8.0  |
| $u_{107}$ | Cl(5)...H(17) | 453.7(57) | 28.2(fixed)            | 5.3  | 28.2 |
| $u_{108}$ | P(1)...H(16)  | 289.6(22) | 18.5(fixed)            | 0.6  | 18.5 |
| $u_{109}$ | P(1)...H(21)  | 372.0(8)  | 18.7(fixed)            | 0.3  | 18.7 |
| $u_{110}$ | C(9)...H(25)  | 286.8(61) | 24.5(fixed)            | 3.7  | 24.5 |
| $u_{111}$ | P(1)...C(9)   | 293.0(9)  | 7.8(Tied to $u_{89}$ ) | -0.1 | 8.0  |
| $u_{112}$ | H(10)...C(12) | 297.1(36) | 23.6(fixed)            | 1.8  | 23.6 |
| $u_{113}$ | H(20)...H(27) | 261.2(51) | 27.9(fixed)            | -0.5 | 27.9 |
| $u_{114}$ | H(24)...H(28) | 297.7(39) | 26.5(fixed)            | -0.5 | 26.5 |
| $u_{115}$ | Cl(5)...H(14) | 290.1(63) | 34.3(fixed)            | 6.2  | 34.3 |
| $u_{116}$ | Cl(6)...H(28) | 300.0(63) | 29.5(fixed)            | 4.7  | 29.5 |
| $u_{117}$ | H(15)...H(17) | 255.0(32) | 29.8(fixed)            | -0.7 | 29.8 |
| $u_{118}$ | H(22)...H(25) | 253.3(36) | 26.7(fixed)            | -0.6 | 26.7 |
| $u_{119}$ | C(3)...C(4)   | 299.6(12) | 9.4(fixed)             | 0.2  | 9.4  |
| $u_{120}$ | H(10)...C(13) | 299.2(42) | 25.2(fixed)            | 1.1  | 25.2 |
| $u_{121}$ | Si(2)...H(28) | 296.3(41) | 24.4(fixed)            | 3.0  | 24.4 |
| $u_{122}$ | P(1)...H(14)  | 301.3(23) | 19.9(fixed)            | -0.1 | 19.9 |
| $u_{123}$ | H(10)...H(14) | 305.6(14) | 12.7(fixed)            | -1.7 | 12.7 |
| $u_{124}$ | H(10)...H(17) | 245.7(16) | 12.7(fixed)            | -1.6 | 12.7 |
| $u_{125}$ | Si(2)...H(17) | 446.4(23) | 26.6(fixed)            | 2.5  | 26.6 |

|           |               |           |                          |      |      |
|-----------|---------------|-----------|--------------------------|------|------|
| $u_{126}$ | C(3)...H(21)  | 446.2(27) | 24.5(fixed)              | 2.7  | 24.5 |
| $u_{127}$ | P(1)...H(28)  | 307.1(23) | 17.3(fixed)              | 0.1  | 17.3 |
| $u_{128}$ | H(21)...H(24) | 254.9(32) | 26.6(fixed)              | -1.0 | 26.6 |
| $u_{129}$ | Cl(7)...H(18) | 312.3(66) | 36.7(fixed)              | 4.5  | 36.7 |
| $u_{130}$ | P(1)...H(18)  | 309.3(20) | 16.9(fixed)              | 0.6  | 16.9 |
| $u_{131}$ | P(1)...H(25)  | 311.0(21) | 17.0(fixed)              | 0.2  | 17.0 |
| $u_{132}$ | P(1)...H(23)  | 309.8(21) | 16.7(fixed)              | 0.2  | 16.7 |
| $u_{133}$ | H(22)...H(26) | 373.7(26) | 27.0(fixed)              | -1.1 | 27.0 |
| $u_{134}$ | H(20)...H(23) | 372.7(23) | 25.6(fixed)              | -1.1 | 25.6 |
| $u_{135}$ | H(14)...H(19) | 260.2(38) | 28.7(fixed)              | -1.4 | 28.7 |
| $u_{136}$ | P(1)...H(17)  | 386.6(9)  | 17.6(fixed)              | -0.1 | 17.6 |
| $u_{137}$ | Si(2)...C(3)  | 326.5(9)  | 10.0(10)                 | 0.1  | 9.9  |
| $u_{138}$ | Cl(6)...H(26) | 447.4(39) | 37.3(fixed)              | 3.0  | 37.3 |
| $u_{139}$ | C(3)...C(13)  | 324.5(24) | 14.3(fixed)              | 0.6  | 14.3 |
| $u_{140}$ | Cl(6)...Cl(7) | 328.4(11) | 10.2(Tied to $u_{142}$ ) | -0.1 | 10.1 |
| $u_{141}$ | Cl(5)...Cl(6) | 328.4(11) | 10.1(Tied to $u_{142}$ ) | -0.2 | 10.0 |
| $u_{142}$ | Cl(5)...Cl(7) | 323.8(24) | 10.3(5)                  | -0.1 | 10.3 |
| $u_{143}$ | Cl(7)...H(17) | 453.8(47) | 40.6(fixed)              | 2.8  | 40.6 |
| $u_{144}$ | Cl(7)...H(28) | 323.0(85) | 43.4(fixed)              | 3.8  | 43.4 |
| $u_{145}$ | C(9)...H(23)  | 317.9(66) | 29.1(fixed)              | 2.4  | 29.1 |
| $u_{146}$ | Si(2)...C(4)  | 332.2(9)  | 9.6(Tied to $u_{137}$ )  | 0.1  | 9.5  |
| $u_{147}$ | Si(2)...H(23) | 334.8(37) | 21.8(fixed)              | 2.4  | 21.8 |
| $u_{148}$ | H(19)...H(25) | 377.4(72) | 32.1(fixed)              | 3.7  | 32.1 |
| $u_{149}$ | Si(2)...H(18) | 340.9(54) | 27.4(fixed)              | 1.0  | 27.4 |
| $u_{150}$ | Si(2)...C(9)  | 339.8(24) | 14.4(14)                 | 0.6  | 14.5 |
| $u_{151}$ | C(4)...H(18)  | 334.4(41) | 20.7(fixed)              | 2.8  | 20.7 |
| $u_{152}$ | C(9)...C(13)  | 337.6(46) | 16.6(fixed)              | 1.6  | 16.6 |
| $u_{153}$ | C(13)...H(20) | 345.2(8)  | 10.4(fixed)              | -1.5 | 10.4 |
| $u_{154}$ | C(12)...H(28) | 346.4(16) | 10.4(fixed)              | -1.4 | 10.4 |
| $u_{155}$ | C(12)...H(23) | 345.1(8)  | 10.3(fixed)              | -1.3 | 10.3 |
| $u_{156}$ | C(11)...H(21) | 278.6(29) | 10.4(fixed)              | -1.5 | 10.4 |
| $u_{157}$ | C(11)...H(25) | 345.2(8)  | 10.4(fixed)              | -1.3 | 10.4 |

|           |               |           |                          |      |      |
|-----------|---------------|-----------|--------------------------|------|------|
| $u_{158}$ | C(13)...H(26) | 279.5(20) | 10.4(fixed)              | -1.5 | 10.4 |
| $u_{159}$ | P(1)...Cl(5)  | 347.7(10) | 12.1(9)                  | -0.1 | 11.9 |
| $u_{160}$ | C(9)...H(16)  | 346.5(8)  | 10.5(fixed)              | -1.8 | 10.5 |
| $u_{161}$ | C(8)...H(18)  | 346.6(8)  | 10.4(fixed)              | -1.7 | 10.4 |
| $u_{162}$ | Si(2)...C(11) | 343.5(27) | 16.6(Tied to $u_{150}$ ) | 0.3  | 16.8 |
| $u_{163}$ | P(1)...Cl(6)  | 350.7(10) | 11.8(Tied to $u_{159}$ ) | -0.2 | 11.6 |
| $u_{164}$ | C(3)...C(12)  | 351.6(25) | 15.8(fixed)              | 0.0  | 15.8 |
| $u_{165}$ | H(10)...H(20) | 353.1(53) | 32.3(fixed)              | -0.3 | 32.3 |
| $u_{166}$ | C(3)...H(23)  | 343.5(47) | 24.1(fixed)              | 0.3  | 24.1 |
| $u_{167}$ | H(10)...H(23) | 348.3(59) | 30.2(fixed)              | -0.5 | 30.2 |
| $u_{168}$ | Cl(6)...C(11) | 354.8(34) | 23.2(Tied to $u_{170}$ ) | 1.9  | 21.1 |
| $u_{169}$ | Si(2)...H(26) | 448.1(28) | 30.8(fixed)              | -0.3 | 30.8 |
| $u_{170}$ | Cl(7)...C(9)  | 359.2(41) | 30.7(18)                 | 1.7  | 28.0 |
| $u_{171}$ | H(21)...H(27) | 322.2(45) | 17.7(fixed)              | -1.8 | 17.7 |
| $u_{172}$ | H(22)...H(28) | 430.7(12) | 18.3(fixed)              | -1.5 | 18.3 |
| $u_{173}$ | P(1)...Cl(7)  | 370.9(9)  | 10.6(Tied to $u_{159}$ ) | -0.1 | 10.4 |
| $u_{174}$ | H(22)...H(23) | 374.3(23) | 17.8(fixed)              | -1.4 | 17.8 |
| $u_{175}$ | H(20)...H(24) | 375.2(20) | 18.0(fixed)              | -1.8 | 18.0 |
| $u_{176}$ | Si(2)...H(14) | 362.3(47) | 27.0(fixed)              | 1.8  | 27.0 |
| $u_{177}$ | H(18)...H(24) | 356.6(66) | 25.7(fixed)              | 4.3  | 25.7 |
| $u_{178}$ | H(24)...H(26) | 258.0(32) | 17.7(fixed)              | -1.8 | 17.7 |
| $u_{179}$ | Cl(5)...C(9)  | 370.9(55) | 23.6(Tied to $u_{170}$ ) | 0.7  | 21.5 |
| $u_{180}$ | H(15)...H(18) | 374.3(19) | 18.1(fixed)              | -1.8 | 18.1 |
| $u_{181}$ | H(16)...H(19) | 377.1(22) | 18.5(fixed)              | -2.0 | 18.5 |
| $u_{182}$ | P(1)...H(22)  | 289.0(23) | 10.9(fixed)              | -1.7 | 10.9 |
| $u_{183}$ | H(25)...H(27) | 430.1(11) | 18.3(fixed)              | -1.5 | 18.3 |
| $u_{184}$ | H(25)...H(28) | 371.4(21) | 17.8(fixed)              | -1.5 | 17.8 |
| $u_{185}$ | Cl(7)...C(13) | 377.2(36) | 23.0(Tied to $u_{170}$ ) | 2.3  | 21.0 |
| $u_{186}$ | H(20)...H(25) | 373.2(21) | 17.5(fixed)              | -1.9 | 17.5 |
| $u_{187}$ | H(20)...H(28) | 377.2(31) | 18.0(fixed)              | -1.8 | 18.0 |
| $u_{188}$ | P(1)...H(27)  | 284.1(20) | 11.3(fixed)              | -1.6 | 11.3 |
| $u_{189}$ | H(23)...H(26) | 319.5(38) | 17.8(fixed)              | -1.7 | 17.8 |

|           |               |           |                          |      |      |
|-----------|---------------|-----------|--------------------------|------|------|
| $u_{190}$ | P(1)...H(15)  | 375.5(9)  | 10.9(fixed)              | -2.0 | 10.9 |
| $u_{191}$ | C(3)...Cl(5)  | 374.9(22) | 18.5(Tied to $u_{170}$ ) | 0.4  | 16.9 |
| $u_{192}$ | C(4)...C(9)   | 372.3(28) | 12.3(fixed)              | 0.2  | 12.3 |
| $u_{193}$ | H(16)...H(17) | 375.3(21) | 18.5(fixed)              | -2.3 | 18.5 |
| $u_{194}$ | H(21)...H(23) | 374.1(19) | 18.3(fixed)              | -1.5 | 18.3 |
| $u_{195}$ | H(21)...H(26) | 254.4(41) | 18.4(fixed)              | -1.9 | 18.4 |
| $u_{196}$ | H(16)...H(21) | 540.4(51) | 40.0(fixed)              | 3.9  | 40.0 |
| $u_{197}$ | H(14)...H(18) | 378.5(23) | 19.0(fixed)              | -2.1 | 19.0 |
| $u_{198}$ | H(10)...H(22) | 228.4(46) | 27.0(fixed)              | 0.1  | 27.0 |
| $u_{199}$ | Cl(5)...C(8)  | 374.9(46) | 29.0(Tied to $u_{170}$ ) | 0.9  | 26.4 |
| $u_{200}$ | Si(2)...C(13) | 384.1(26) | 13.3(Tied to $u_{150}$ ) | 0.3  | 13.5 |
| $u_{201}$ | H(17)...H(23) | 397.1(71) | 36.5(fixed)              | 1.5  | 36.5 |
| $u_{202}$ | P(1)...H(24)  | 385.3(8)  | 10.8(fixed)              | -1.4 | 10.8 |
| $u_{203}$ | H(17)...H(25) | 333.7(61) | 27.7(fixed)              | 0.5  | 27.7 |
| $u_{204}$ | P(1)...H(19)  | 322.4(21) | 10.9(fixed)              | -1.7 | 10.9 |
| $u_{205}$ | H(10)...H(24) | 389.1(42) | 28.3(fixed)              | -0.2 | 28.3 |
| $u_{206}$ | C(3)...H(20)  | 394.4(41) | 26.0(fixed)              | -1.2 | 26.0 |
| $u_{207}$ | C(8)...H(21)  | 559.5(34) | 30.7(fixed)              | 2.0  | 30.7 |
| $u_{208}$ | C(4)...Cl(7)  | 402.3(23) | 21.2(Tied to $u_{170}$ ) | 0.4  | 19.3 |
| $u_{209}$ | Si(2)...C(8)  | 398.8(30) | 16.3(Tied to $u_{150}$ ) | -0.6 | 16.5 |
| $u_{210}$ | Cl(7)...C(11) | 406.1(64) | 37.4(Tied to $u_{170}$ ) | 0.0  | 34.0 |
| $u_{211}$ | H(19)...H(23) | 366.3(81) | 33.4(fixed)              | 0.2  | 33.4 |
| $u_{212}$ | Si(2)...H(10) | 411.4(15) | 13.0(fixed)              | -1.0 | 13.0 |
| $u_{213}$ | C(13)...H(19) | 408.3(61) | 24.8(fixed)              | 0.2  | 24.8 |
| $u_{214}$ | H(18)...H(21) | 495.6(64) | 33.0(fixed)              | 2.0  | 33.0 |
| $u_{215}$ | Cl(5)...H(18) | 418.5(77) | 31.8(fixed)              | -1.2 | 31.8 |
| $u_{216}$ | C(4)...Cl(6)  | 419.9(25) | 18.3(15)                 | -0.1 | 16.1 |
| $u_{217}$ | C(13)...H(17) | 407.6(49) | 23.9(fixed)              | -0.4 | 23.9 |
| $u_{218}$ | C(9)...H(21)  | 534.0(45) | 26.8(fixed)              | 1.4  | 26.8 |
| $u_{219}$ | C(3)...Cl(7)  | 419.8(25) | 22.0(Tied to $u_{216}$ ) | 0.1  | 19.3 |
| $u_{220}$ | Cl(7)...H(25) | 426.9(63) | 29.0(fixed)              | 0.8  | 29.0 |
| $u_{221}$ | H(16)...H(20) | 429.8(66) | 40.1(fixed)              | 2.2  | 40.1 |

|                         |               |           |             |      |      |
|-------------------------|---------------|-----------|-------------|------|------|
| <i>u</i> <sub>222</sub> | C(4)...C(8)   | 428.9(13) | 11.2(fixed) | -0.9 | 11.2 |
| <i>u</i> <sub>223</sub> | C(3)...H(24)  | 428.1(24) | 16.7(fixed) | -1.2 | 16.7 |
| <i>u</i> <sub>224</sub> | Si(2)...H(25) | 430.5(43) | 22.1(fixed) | -0.6 | 22.1 |
| <i>u</i> <sub>225</sub> | C(12)...H(16) | 436.2(48) | 30.0(fixed) | 1.1  | 30.0 |
| <i>u</i> <sub>226</sub> | H(20)...H(23) | 430.2(10) | 13.7(fixed) | -2.5 | 13.7 |
| <i>u</i> <sub>227</sub> | H(25)...H(26) | 377.2(20) | 13.7(fixed) | -2.5 | 13.7 |
| <i>u</i> <sub>228</sub> | H(21)...H(28) | 374.9(26) | 13.7(fixed) | -2.6 | 13.7 |
| <i>u</i> <sub>229</sub> | H(16)...H(18) | 430.7(10) | 13.8(fixed) | -2.9 | 13.8 |
| <i>u</i> <sub>230</sub> | C(3)...C(11)  | 430.8(12) | 9.5(fixed)  | -0.8 | 9.5  |
| <i>u</i> <sub>231</sub> | H(10)...C(11) | 434.1(21) | 17.8(fixed) | -0.7 | 17.8 |
| <i>u</i> <sub>232</sub> | C(8)...H(25)  | 430.5(37) | 25.2(fixed) | 1.4  | 25.2 |
| <i>u</i> <sub>233</sub> | C(4)...H(16)  | 437.6(26) | 20.4(fixed) | -0.2 | 20.4 |
| <i>u</i> <sub>234</sub> | C(4)...H(17)  | 456.9(30) | 20.4(fixed) | -1.2 | 20.4 |
| <i>u</i> <sub>235</sub> | Cl(5)...H(16) | 434.5(69) | 36.3(fixed) | -1.4 | 36.3 |
| <i>u</i> <sub>236</sub> | C(12)...H(18) | 433.1(53) | 24.5(fixed) | 1.1  | 24.5 |
| <i>u</i> <sub>237</sub> | C(3)...H(22)  | 308.1(37) | 18.8(fixed) | -1.9 | 18.8 |
| <i>u</i> <sub>238</sub> | H(18)...H(28) | 430.7(64) | 31.9(fixed) | 3.8  | 31.9 |
| <i>u</i> <sub>239</sub> | C(9)...H(24)  | 439.4(49) | 19.1(fixed) | -0.3 | 19.1 |
| <i>u</i> <sub>240</sub> | Si(2)...H(19) | 301.2(36) | 16.9(fixed) | -2.0 | 16.9 |
| <i>u</i> <sub>241</sub> | Si(2)...H(16) | 445.8(44) | 25.4(fixed) | -1.8 | 25.4 |
| <i>u</i> <sub>242</sub> | H(15)...H(21) | 622.4(43) | 36.0(fixed) | 2.0  | 36.0 |
| <i>u</i> <sub>243</sub> | Cl(7)...H(24) | 450.9(43) | 27.3(fixed) | 0.9  | 27.3 |
| <i>u</i> <sub>244</sub> | Cl(6)...H(27) | 319.8(54) | 24.5(fixed) | -0.5 | 24.5 |
| <i>u</i> <sub>245</sub> | C(8)...C(12)  | 457.4(33) | 20.8(fixed) | -0.9 | 20.8 |
| <i>u</i> <sub>246</sub> | Si(2)...H(27) | 352.4(52) | 18.3(fixed) | -1.9 | 18.3 |
| <i>u</i> <sub>247</sub> | Cl(5)...H(19) | 287.6(68) | 26.7(fixed) | -1.3 | 26.7 |
| <i>u</i> <sub>248</sub> | C(9)...C(12)  | 455.4(38) | 17.3(fixed) | -0.7 | 17.3 |
| <i>u</i> <sub>249</sub> | Cl(5)...H(15) | 449.1(50) | 32.0(fixed) | -1.1 | 32.0 |
| <i>u</i> <sub>250</sub> | C(11)...H(18) | 446.0(47) | 23.4(fixed) | 2.3  | 23.4 |
| <i>u</i> <sub>251</sub> | C(4)...H(19)  | 430.7(40) | 18.1(fixed) | -1.4 | 18.1 |
| <i>u</i> <sub>252</sub> | H(19)...H(21) | 614.4(45) | 34.4(fixed) | 1.7  | 34.4 |
| <i>u</i> <sub>253</sub> | C(3)...H(28)  | 453.3(28) | 17.6(fixed) | -0.7 | 17.6 |

|           |               |           |                          |      |      |
|-----------|---------------|-----------|--------------------------|------|------|
| $u_{254}$ | Cl(7)...H(19) | 317.7(65) | 32.0(fixed)              | -0.9 | 32.0 |
| $u_{255}$ | Cl(6)...H(23) | 463.2(68) | 30.0(fixed)              | 0.7  | 30.0 |
| $u_{256}$ | C(3)...H(26)  | 514.4(13) | 17.3(fixed)              | -1.2 | 17.3 |
| $u_{257}$ | Si(2)...C(12) | 465.1(9)  | 9.9(fixed)               | -0.9 | 9.9  |
| $u_{258}$ | Cl(7)...H(26) | 485.8(71) | 41.2(fixed)              | -2.4 | 41.2 |
| $u_{259}$ | C(8)...H(20)  | 472.7(53) | 32.5(fixed)              | -1.4 | 32.5 |
| $u_{260}$ | H(15)...H(25) | 469.0(42) | 29.8(fixed)              | 2.1  | 29.8 |
| $u_{261}$ | H(10)...H(26) | 500.3(24) | 21.6(fixed)              | -1.3 | 21.6 |
| $u_{262}$ | H(16)...H(25) | 471.9(44) | 30.5(fixed)              | 0.5  | 30.5 |
| $u_{263}$ | Si(2)...H(24) | 475.7(27) | 17.3(fixed)              | -1.3 | 17.3 |
| $u_{264}$ | C(8)...C(13)  | 475.3(23) | 15.1(fixed)              | -0.7 | 15.1 |
| $u_{265}$ | C(4)...H(14)  | 475.8(19) | 17.8(fixed)              | -1.9 | 17.8 |
| $u_{266}$ | H(10)...H(28) | 475.5(29) | 21.8(fixed)              | -1.4 | 21.8 |
| $u_{267}$ | Cl(5)...H(10) | 481.7(22) | 17.9(fixed)              | -1.2 | 17.9 |
| $u_{268}$ | Si(2)...H(20) | 483.0(22) | 18.7(fixed)              | -0.9 | 18.7 |
| $u_{269}$ | H(14)...H(21) | 631.8(31) | 31.6(fixed)              | -1.3 | 31.6 |
| $u_{270}$ | Cl(7)...H(27) | 458.1(80) | 38.3(fixed)              | -1.5 | 38.3 |
| $u_{271}$ | Cl(7)...H(10) | 490.7(33) | 22.9(fixed)              | -0.7 | 22.9 |
| $u_{272}$ | Si(2)...H(15) | 489.9(29) | 19.8(fixed)              | -2.6 | 19.8 |
| $u_{273}$ | H(10)...H(27) | 472.4(21) | 21.8(fixed)              | -1.1 | 21.8 |
| $u_{274}$ | C(9)...H(28)  | 486.2(51) | 24.2(fixed)              | 0.5  | 24.2 |
| $u_{275}$ | C(9)...C(11)  | 492.6(33) | 14.5(fixed)              | -0.6 | 14.5 |
| $u_{276}$ | Cl(6)...C(13) | 504.3(50) | 25.2(13)                 | -0.9 | 21.3 |
| $u_{277}$ | H(14)...H(25) | 496.8(38) | 25.2(fixed)              | -0.5 | 25.2 |
| $u_{278}$ | Si(2)...H(21) | 546.9(11) | 16.9(fixed)              | -1.2 | 16.9 |
| $u_{279}$ | C(8)...H(23)  | 493.7(46) | 23.7(fixed)              | -1.1 | 23.7 |
| $u_{280}$ | H(18)...H(22) | 408.4(68) | 29.3(fixed)              | 0.8  | 29.3 |
| $u_{281}$ | C(3)...Cl(6)  | 503.8(11) | 11.9(8)                  | -1.2 | 10.9 |
| $u_{282}$ | C(4)...H(15)  | 508.4(16) | 15.7(fixed)              | -2.2 | 15.7 |
| $u_{283}$ | C(4)...Cl(5)  | 505.0(10) | 12.0(Tied to $u_{281}$ ) | -1.0 | 10.9 |
| $u_{284}$ | H(17)...H(21) | 592.0(54) | 26.2(fixed)              | -1.3 | 26.2 |
| $u_{285}$ | H(19)...H(24) | 512.1(65) | 29.0(fixed)              | -1.5 | 29.0 |



|           |               |           |                          |      |      |
|-----------|---------------|-----------|--------------------------|------|------|
| $u_{286}$ | Cl(5)...H(28) | 500.1(40) | 24.1(fixed)              | 0.3  | 24.1 |
| $u_{287}$ | Cl(7)...H(14) | 496.9(67) | 31.6(fixed)              | 0.2  | 31.6 |
| $u_{288}$ | Cl(5)...H(23) | 501.8(34) | 24.3(fixed)              | 1.1  | 24.3 |
| $u_{289}$ | C(13)...H(16) | 510.6(29) | 21.9(fixed)              | -1.3 | 21.9 |
| $u_{290}$ | Cl(6)...H(17) | 647.9(21) | 26.5(fixed)              | 0.7  | 26.5 |
| $u_{291}$ | C(3)...H(27)  | 460.9(17) | 13.2(fixed)              | -2.0 | 13.2 |
| $u_{292}$ | C(12)...H(19) | 530.9(36) | 25.3(fixed)              | -1.6 | 25.3 |
| $u_{293}$ | H(18)...H(20) | 510.9(48) | 26.5(fixed)              | -1.5 | 26.5 |
| $u_{294}$ | C(9)...H(20)  | 518.1(40) | 23.8(fixed)              | -2.5 | 23.8 |
| $u_{295}$ | C(12)...H(15) | 526.9(39) | 26.9(fixed)              | -2.1 | 26.9 |
| $u_{296}$ | H(17)...H(24) | 500.4(56) | 25.8(fixed)              | -2.7 | 25.8 |
| $u_{297}$ | H(18)...H(27) | 515.4(44) | 26.8(fixed)              | 1.7  | 26.8 |
| $u_{298}$ | H(17)...H(28) | 586.7(51) | 34.6(fixed)              | 0.5  | 34.6 |
| $u_{299}$ | C(12)...H(14) | 526.9(32) | 23.6(fixed)              | -3.0 | 23.6 |
| $u_{300}$ | H(18)...H(26) | 514.6(55) | 25.8(fixed)              | -0.2 | 25.8 |
| $u_{301}$ | Cl(6)...H(20) | 528.6(37) | 28.6(fixed)              | 0.1  | 28.6 |
| $u_{302}$ | Cl(6)...H(14) | 520.7(44) | 31.2(fixed)              | 0.3  | 31.2 |
| $u_{303}$ | Cl(7)...C(8)  | 523.4(43) | 27.0(Tied to $u_{276}$ ) | -1.4 | 22.7 |
| $u_{304}$ | C(13)...H(14) | 527.2(25) | 17.2(fixed)              | -1.8 | 17.2 |
| $u_{305}$ | C(13)...H(15) | 532.5(30) | 20.9(fixed)              | -1.2 | 20.9 |
| $u_{306}$ | H(14)...H(20) | 534.7(54) | 35.4(fixed)              | -3.1 | 35.4 |
| $u_{307}$ | C(12)...H(17) | 519.0(44) | 19.2(fixed)              | -2.7 | 19.2 |
| $u_{308}$ | H(16)...H(22) | 382.3(65) | 32.6(fixed)              | -1.9 | 32.6 |
| $u_{309}$ | C(9)...H(22)  | 416.9(51) | 21.9(fixed)              | -2.0 | 21.9 |
| $u_{310}$ | Cl(6)...H(18) | 533.4(50) | 28.1(fixed)              | -0.1 | 28.1 |
| $u_{311}$ | H(14)...H(23) | 526.8(52) | 27.2(fixed)              | -1.0 | 27.2 |
| $u_{312}$ | Cl(6)...C(12) | 540.3(22) | 22.4(Tied to $u_{276}$ ) | -1.1 | 18.8 |
| $u_{313}$ | C(11)...H(17) | 587.4(33) | 25.6(fixed)              | -1.5 | 25.6 |
| $u_{314}$ | Cl(6)...C(9)  | 540.5(22) | 17.1(Tied to $u_{276}$ ) | -1.0 | 14.4 |
| $u_{315}$ | Cl(5)...H(18) | 646.7(22) | 29.2(fixed)              | -1.7 | 29.2 |
| $u_{316}$ | H(16)...H(26) | 639.1(33) | 29.7(fixed)              | 0.0  | 29.7 |
| $u_{317}$ | Cl(5)...C(11) | 539.8(21) | 17.9(Tied to $u_{276}$ ) | -1.5 | 15.1 |

|           |               |           |                          |      |      |
|-----------|---------------|-----------|--------------------------|------|------|
| $u_{318}$ | H(15)...H(20) | 551.7(60) | 37.5(fixed)              | -3.5 | 37.5 |
| $u_{319}$ | Si(2)...H(22) | 499.9(19) | 13.7(fixed)              | -2.1 | 13.7 |
| $u_{320}$ | C(8)...C(11)  | 550.0(10) | 11.0(fixed)              | -2.0 | 11.0 |
| $u_{321}$ | Cl(7)...C(12) | 553.1(20) | 21.5(Tied to $u_{276}$ ) | -1.1 | 18.1 |
| $u_{322}$ | C(11)...H(16) | 553.7(26) | 21.5(fixed)              | -1.3 | 21.5 |
| $u_{323}$ | C(9)...H(26)  | 572.3(38) | 19.3(fixed)              | -2.0 | 19.3 |
| $u_{324}$ | H(17)...H(23) | 545.8(41) | 25.2(fixed)              | -2.5 | 25.2 |
| $u_{325}$ | Cl(5)...C(13) | 551.0(21) | 18.1(Tied to $u_{276}$ ) | -0.6 | 15.2 |
| $u_{326}$ | C(8)...H(22)  | 404.1(47) | 23.3(fixed)              | -3.4 | 23.3 |
| $u_{327}$ | C(8)...H(26)  | 639.4(13) | 20.8(fixed)              | -1.7 | 20.8 |
| $u_{328}$ | H(15)...H(23) | 551.6(54) | 28.5(fixed)              | -1.7 | 28.5 |
| $u_{329}$ | Cl(6)...C(8)  | 562.8(29) | 23.2(Tied to $u_{276}$ ) | -1.9 | 19.6 |
| $u_{330}$ | Cl(6)...H(24) | 571.5(57) | 26.9(fixed)              | -1.9 | 26.9 |
| $u_{331}$ | Cl(5)...H(25) | 568.3(44) | 25.5(fixed)              | -0.4 | 25.5 |
| $u_{332}$ | Cl(6)...H(25) | 577.7(49) | 23.6(fixed)              | -2.6 | 23.6 |
| $u_{333}$ | Cl(6)...H(10) | 576.5(15) | 14.6(fixed)              | -2.2 | 14.6 |
| $u_{334}$ | C(9)...H(27)  | 544.0(30) | 18.1(fixed)              | -1.8 | 18.1 |
| $u_{335}$ | C(8)...H(24)  | 577.5(24) | 18.6(fixed)              | -2.8 | 18.6 |
| $u_{336}$ | C(8)...H(28)  | 575.9(27) | 18.2(fixed)              | -2.1 | 18.2 |
| $u_{337}$ | C(11)...H(14) | 577.1(24) | 21.0(fixed)              | -2.3 | 21.0 |
| $u_{338}$ | H(14)...H(26) | 675.7(23) | 30.1(fixed)              | -1.9 | 30.1 |
| $u_{339}$ | H(19)...H(20) | 582.8(37) | 30.4(fixed)              | -3.9 | 30.4 |
| $u_{340}$ | H(17)...H(26) | 660.1(40) | 29.7(fixed)              | -2.5 | 29.7 |
| $u_{341}$ | Cl(6)...H(16) | 581.9(50) | 32.0(fixed)              | -2.3 | 32.0 |
| $u_{342}$ | H(17)...H(20) | 586.0(49) | 25.2(fixed)              | -3.9 | 25.2 |
| $u_{343}$ | Cl(7)...H(21) | 610.4(27) | 21.0(fixed)              | -1.4 | 21.0 |
| $u_{344}$ | H(19)...H(22) | 504.4(45) | 30.9(fixed)              | -2.9 | 30.9 |
| $u_{345}$ | C(11)...H(19) | 529.3(51) | 18.1(fixed)              | -2.8 | 18.1 |
| $u_{346}$ | Cl(7)...H(15) | 590.7(48) | 29.4(fixed)              | -2.5 | 29.4 |
| $u_{347}$ | H(19)...H(28) | 505.8(70) | 26.1(fixed)              | -2.3 | 26.1 |
| $u_{348}$ | H(14)...H(28) | 587.6(42) | 27.2(fixed)              | -1.5 | 27.2 |
| $u_{349}$ | H(16)...H(22) | 596.1(30) | 24.7(fixed)              | -2.6 | 24.7 |

|           |               |           |             |      |      |
|-----------|---------------|-----------|-------------|------|------|
| $u_{350}$ | Cl(7)...H(16) | 594.4(42) | 24.2(fixed) | -3.4 | 24.2 |
| $u_{351}$ | Cl(7)...H(20) | 602.5(26) | 22.6(fixed) | -2.5 | 22.6 |
| $u_{352}$ | H(16)...H(24) | 605.9(35) | 26.2(fixed) | -3.1 | 26.2 |
| $u_{353}$ | Cl(6)...H(22) | 605.0(24) | 23.0(fixed) | -2.1 | 23.0 |
| $u_{354}$ | Cl(6)...H(21) | 609.0(30) | 21.6(fixed) | -2.9 | 21.6 |
| $u_{355}$ | Cl(7)...H(22) | 586.8(26) | 23.9(fixed) | -1.5 | 23.9 |
| $u_{356}$ | H(15)...H(22) | 457.1(53) | 30.7(fixed) | -4.4 | 30.7 |
| $u_{357}$ | Cl(5)...C(12) | 617.8(11) | 12.9(fixed) | -1.7 | 12.9 |
| $u_{358}$ | H(17)...H(22) | 461.6(60) | 23.0(fixed) | -4.4 | 23.0 |
| $u_{359}$ | Cl(5)...H(20) | 626.6(26) | 22.4(fixed) | -1.7 | 22.4 |
| $u_{360}$ | H(17)...H(27) | 641.6(28) | 27.1(fixed) | -3.4 | 27.1 |
| $u_{361}$ | H(15)...H(24) | 631.3(33) | 25.1(fixed) | -3.3 | 25.1 |
| $u_{362}$ | Cl(5)...H(21) | 712.5(10) | 22.3(fixed) | -1.1 | 22.3 |
| $u_{363}$ | H(14)...H(22) | 489.5(45) | 24.3(fixed) | -5.7 | 24.3 |
| $u_{364}$ | H(16)...H(27) | 544.4(39) | 24.8(fixed) | -2.8 | 24.8 |
| $u_{365}$ | C(8)...H(27)  | 556.8(23) | 14.6(fixed) | -3.6 | 14.6 |
| $u_{366}$ | H(14)...H(24) | 633.8(24) | 18.8(fixed) | -4.3 | 18.8 |
| $u_{367}$ | C(11)...H(15) | 640.0(12) | 14.0(fixed) | -3.9 | 14.0 |
| $u_{368}$ | H(19)...H(26) | 618.7(55) | 20.5(fixed) | -4.4 | 20.5 |
| $u_{369}$ | Cl(6)...H(19) | 504.4(36) | 16.4(fixed) | -3.9 | 16.4 |
| $u_{370}$ | Cl(5)...H(27) | 535.3(43) | 16.7(fixed) | -4.0 | 16.7 |
| $u_{371}$ | Cl(5)...H(24) | 652.7(23) | 17.6(fixed) | -2.8 | 17.6 |
| $u_{372}$ | H(15)...H(26) | 723.9(17) | 21.8(fixed) | -4.5 | 21.8 |
| $u_{373}$ | H(19)...H(27) | 571.6(50) | 23.2(fixed) | -3.8 | 23.2 |
| $u_{374}$ | H(15)...Cl(6) | 664.2(28) | 20.9(fixed) | -4.8 | 20.9 |
| $u_{375}$ | H(15)...H(28) | 665.4(29) | 19.7(fixed) | -4.2 | 19.7 |
| $u_{376}$ | H(14)...H(27) | 575.6(36) | 21.5(fixed) | -4.7 | 21.5 |
| $u_{377}$ | Cl(5)...H(22) | 627.5(25) | 14.4(fixed) | -3.7 | 14.4 |
| $u_{378}$ | H(15)...H(27) | 655.2(22) | 18.5(fixed) | -5.3 | 18.5 |

<sup>a</sup> Distances in pm. Values in parentheses are the standard deviations in terms of the last digits.

<sup>b</sup> Unrefined amplitudes of vibration were fixed at the values obtained using the B3LYP-D3/Def2TZVP force field.

**Table S8.** Refined and calculated (B3LYP-D3/Def2TZVP) amplitudes of vibration ( $u$ ), associated  $r_a$  distances and corresponding correction values ( $k$ ) for the  $r_{\text{hl}}$  refinement of the Combined Model for +77++&+51-- of **1**.<sup>a,b</sup>

|          | Atom pair   | $r_a$    | $u_{\text{GED}}$       | $k$ | $u_{\text{calc.}}$ |
|----------|-------------|----------|------------------------|-----|--------------------|
| $u_1$    | C(9)-H(18)  | 108.8(3) | 7.3(Tied to $u_{28}$ ) | 0.4 | 7.63               |
| $u_2$    | C(41)-H(53) | 108.8(3) | 7.3(Tied to $u_{28}$ ) | 0.4 | 7.63               |
| $u_3$    | C(37)-H(46) | 108.8(3) | 7.3(Tied to $u_{28}$ ) | 0.4 | 7.64               |
| $u_4$    | C(13)-H(23) | 108.8(3) | 7.3(Tied to $u_{28}$ ) | 0.4 | 7.64               |
| $u_5$    | C(37)-H(45) | 108.8(3) | 7.3(Tied to $u_{28}$ ) | 0.4 | 7.65               |
| $u_6$    | C(39)-H(56) | 108.8(3) | 7.3(Tied to $u_{28}$ ) | 0.4 | 7.65               |
| $u_7$    | C(40)-H(49) | 108.8(3) | 7.3(Tied to $u_{28}$ ) | 0.4 | 7.66               |
| $u_8$    | C(13)-H(25) | 108.8(3) | 7.4(Tied to $u_{28}$ ) | 0.4 | 7.67               |
| $u_9$    | C(41)-H(51) | 108.8(3) | 7.4(Tied to $u_{28}$ ) | 0.4 | 7.67               |
| $u_{10}$ | C(36)-H(42) | 108.8(3) | 7.3(Tied to $u_{28}$ ) | 0.4 | 7.66               |
| $u_{11}$ | C(11)-H(28) | 108.8(3) | 7.4(Tied to $u_{28}$ ) | 0.4 | 7.67               |
| $u_{12}$ | C(8)-H(16)  | 108.8(3) | 7.4(Tied to $u_{28}$ ) | 0.4 | 7.67               |
| $u_{13}$ | C(36)-H(44) | 108.8(3) | 7.4(Tied to $u_{28}$ ) | 0.4 | 7.67               |
| $u_{14}$ | C(9)-H(17)  | 108.8(3) | 7.4(Tied to $u_{28}$ ) | 0.4 | 7.67               |
| $u_{15}$ | C(12)-H(20) | 108.8(3) | 7.4(Tied to $u_{28}$ ) | 0.4 | 7.67               |
| $u_{16}$ | C(39)-H(54) | 108.8(3) | 7.4(Tied to $u_{28}$ ) | 0.4 | 7.68               |
| $u_{17}$ | C(11)-H(26) | 108.8(3) | 7.4(Tied to $u_{28}$ ) | 0.4 | 7.68               |
| $u_{18}$ | C(8)-H(14)  | 108.8(3) | 7.4(Tied to $u_{28}$ ) | 0.4 | 7.68               |
| $u_{19}$ | C(12)-H(21) | 108.8(3) | 7.4(Tied to $u_{28}$ ) | 0.4 | 7.69               |
| $u_{20}$ | C(40)-H(48) | 108.8(3) | 7.4(Tied to $u_{28}$ ) | 0.4 | 7.7                |
| $u_{21}$ | C(36)-H(43) | 108.8(3) | 7.4(Tied to $u_{28}$ ) | 0.4 | 7.71               |
| $u_{22}$ | C(8)-H(15)  | 108.8(3) | 7.4(Tied to $u_{28}$ ) | 0.4 | 7.71               |
| $u_{23}$ | C(40)-H(50) | 108.8(3) | 7.4(Tied to $u_{28}$ ) | 0.4 | 7.71               |
| $u_{24}$ | C(11)-H(27) | 108.8(3) | 7.4(Tied to $u_{28}$ ) | 0.4 | 7.72               |
| $u_{25}$ | C(9)-H(19)  | 108.8(3) | 7.4(Tied to $u_{28}$ ) | 0.4 | 7.72               |
| $u_{26}$ | C(37)-H(47) | 108.8(3) | 7.4(Tied to $u_{28}$ ) | 0.4 | 7.72               |
| $u_{27}$ | C(12)-H(22) | 108.8(3) | 7.4(Tied to $u_{28}$ ) | 0.4 | 7.72               |
| $u_{28}$ | C(39)-H(55) | 108.8(3) | 7.45                   | 0.4 | 7.72               |
| $u_{29}$ | C(13)-H(24) | 108.8(3) | 7.4(Tied to $u_{28}$ ) | 0.4 | 7.73               |

|          |               |          |                        |      |       |
|----------|---------------|----------|------------------------|------|-------|
| $u_{30}$ | C(41)-H(52)   | 108.8(3) | 7.4(Tied to $u_{28}$ ) | 0.4  | 7.73  |
| $u_{31}$ | C(31)-H(38)   | 108.8(3) | 7.4(Tied to $u_{28}$ ) | 0.4  | 7.75  |
| $u_{32}$ | C(3)-H(10)    | 108.8(3) | 7.4(Tied to $u_{28}$ ) | 0.4  | 7.75  |
| $u_{33}$ | C(31)-C(37)   | 153.5(2) | 4.0(Tied to $u_{37}$ ) | 0.1  | 5.25  |
| $u_{34}$ | C(4)-C(13)    | 153.5(2) | 4.0(Tied to $u_{37}$ ) | 0.2  | 5.27  |
| $u_{35}$ | C(3)-C(9)     | 153.5(2) | 4.0(Tied to $u_{37}$ ) | 0.1  | 5.27  |
| $u_{36}$ | C(32)-C(41)   | 153.5(2) | 4.0(Tied to $u_{37}$ ) | 0.2  | 5.29  |
| $u_{37}$ | C(3)-C(8)     | 153.5(2) | 4.03                   | 0.2  | 5.27  |
| $u_{38}$ | C(31)-C(36)   | 153.5(2) | 4.0(Tied to $u_{37}$ ) | 0.2  | 5.28  |
| $u_{39}$ | C(4)-C(11)    | 153.5(2) | 4.0(Tied to $u_{37}$ ) | 0.2  | 5.29  |
| $u_{40}$ | C(32)-C(40)   | 153.5(2) | 4.0(Tied to $u_{37}$ ) | 0.2  | 5.33  |
| $u_{41}$ | C(32)-C(39)   | 153.5(2) | 4.0(Tied to $u_{37}$ ) | 0.2  | 5.32  |
| $u_{42}$ | C(4)-C(12)    | 153.5(2) | 4.0(Tied to $u_{37}$ ) | 0.2  | 5.34  |
| $u_{43}$ | H(17)...H(19) | 176.1(7) | 12.4(fixed)            | 0.0  | 12.41 |
| $u_{44}$ | H(24)...H(25) | 176.1(7) | 12.4(fixed)            | 0.0  | 12.4  |
| $u_{45}$ | H(51)...H(52) | 176.1(7) | 12.4(fixed)            | 0.0  | 12.4  |
| $u_{46}$ | H(49)...H(50) | 176.1(7) | 12.4(fixed)            | 0.0  | 12.37 |
| $u_{47}$ | H(46)...H(47) | 176.1(7) | 12.4(fixed)            | 0.0  | 12.39 |
| $u_{48}$ | H(45)...H(46) | 176.1(7) | 12.4(fixed)            | -0.1 | 12.38 |
| $u_{49}$ | H(51)...H(53) | 176.1(7) | 12.4(fixed)            | 0.0  | 12.37 |
| $u_{50}$ | H(27)...H(28) | 176.1(7) | 12.4(fixed)            | 0.0  | 12.39 |
| $u_{51}$ | H(21)...H(22) | 176.1(7) | 12.4(fixed)            | 0.0  | 12.41 |
| $u_{52}$ | H(42)...H(43) | 176.1(7) | 12.4(fixed)            | 0.0  | 12.37 |
| $u_{53}$ | H(17)...H(18) | 176.1(7) | 12.4(fixed)            | 0.0  | 12.36 |
| $u_{54}$ | H(48)...H(50) | 176.1(7) | 12.4(fixed)            | 0.0  | 12.42 |
| $u_{55}$ | H(55)...H(56) | 176.1(7) | 12.4(fixed)            | 0.0  | 12.39 |
| $u_{56}$ | H(42)...H(44) | 176.1(7) | 12.4(fixed)            | 0.0  | 12.39 |
| $u_{57}$ | H(45)...H(47) | 176.1(7) | 12.4(fixed)            | -0.1 | 12.38 |
| $u_{58}$ | H(14)...H(15) | 176.1(7) | 12.4(fixed)            | -0.1 | 12.4  |
| $u_{59}$ | H(52)...H(53) | 176.1(7) | 12.4(fixed)            | 0.0  | 12.38 |
| $u_{60}$ | H(18)...H(19) | 176.1(7) | 12.4(fixed)            | 0.0  | 12.36 |
| $u_{61}$ | H(23)...H(24) | 176.1(7) | 12.4(fixed)            | 0.0  | 12.38 |

|          |               |           |                         |      |       |
|----------|---------------|-----------|-------------------------|------|-------|
| $u_{62}$ | H(14)...H(16) | 176.1(7)  | 12.4(fixed)             | 0.0  | 12.39 |
| $u_{63}$ | H(54)...H(56) | 176.1(7)  | 12.4(fixed)             | 0.0  | 12.36 |
| $u_{64}$ | H(26)...H(28) | 176.1(7)  | 12.4(fixed)             | 0.0  | 12.4  |
| $u_{65}$ | H(26)...H(27) | 176.1(7)  | 12.4(fixed)             | 0.0  | 12.42 |
| $u_{66}$ | H(20)...H(21) | 176.1(7)  | 12.4(fixed)             | 0.0  | 12.39 |
| $u_{67}$ | H(23)...H(25) | 176.1(7)  | 12.3(fixed)             | 0.0  | 12.33 |
| $u_{68}$ | H(43)...H(44) | 176.1(7)  | 12.4(fixed)             | 0.0  | 12.41 |
| $u_{69}$ | H(20)...H(22) | 176.1(7)  | 12.4(fixed)             | 0.0  | 12.41 |
| $u_{70}$ | H(54)...H(55) | 176.1(7)  | 12.4(fixed)             | 0.0  | 12.42 |
| $u_{71}$ | H(48)...H(49) | 176.1(7)  | 12.4(fixed)             | 0.0  | 12.37 |
| $u_{72}$ | H(15)...H(17) | 176.1(7)  | 12.4(fixed)             | -0.1 | 12.41 |
| $u_{73}$ | P(29)-C(31)   | 187.1(4)  | 5.3(Tied to $u_{74}$ )  | 0.2  | 5.91  |
| $u_{74}$ | P(1)-C(3)     | 187.1(4)  | 5.35.0                  | 0.2  | 5.9   |
| $u_{75}$ | P(1)-C(4)     | 189.0(4)  | 5.4(Tied to $u_{74}$ )  | 0.2  | 6.08  |
| $u_{76}$ | P(29)-C(32)   | 189.7(5)  | 5.5(Tied to $u_{74}$ )  | 0.2  | 6.15  |
| $u_{77}$ | Si(2)-Cl(6)   | 203.7(1)  | 4.6(Tied to $u_{79}$ )  | 0.2  | 5.13  |
| $u_{78}$ | Si(30)-Cl(33) | 203.7(1)  | 4.6(Tied to $u_{79}$ )  | 0.2  | 5.14  |
| $u_{79}$ | Si(30)-Cl(34) | 203.7(1)  | 4.72                    | 0.2  | 5.17  |
| $u_{80}$ | Si(2)-Cl(5)   | 203.7(1)  | 4.7(Tied to $u_{79}$ )  | 0.2  | 5.18  |
| $u_{81}$ | Si(2)-Cl(7)   | 203.7(1)  | 4.7(Tied to $u_{79}$ )  | 0.2  | 5.25  |
| $u_{82}$ | Si(30)-Cl(35) | 203.7(1)  | 4.7(Tied to $u_{79}$ )  | 0.2  | 5.26  |
| $u_{83}$ | H(46)...H(53) | 188.4(79) | 31.1(fixed)             | 15.5 | 31.12 |
| $u_{84}$ | C(36)...H(38) | 214.5(18) | 10.8(Tied to $u_{87}$ ) | 0.0  | 10.77 |
| $u_{85}$ | C(8)...H(10)  | 215.1(17) | 10.9(Tied to $u_{87}$ ) | 0.0  | 10.81 |
| $u_{86}$ | C(37)...H(38) | 213.7(8)  | 10.8(Tied to $u_{87}$ ) | 0.0  | 10.74 |
| $u_{87}$ | C(9)...H(10)  | 213.7(8)  | 10.811                  | 0.0  | 10.78 |
| $u_{88}$ | C(4)...H(24)  | 217.6(6)  | 10.9(Tied to $u_{87}$ ) | -0.2 | 10.83 |
| $u_{89}$ | C(32)...H(50) | 217.6(6)  | 10.9(Tied to $u_{87}$ ) | -0.2 | 10.86 |
| $u_{90}$ | C(31)...H(47) | 217.6(6)  | 10.9(Tied to $u_{87}$ ) | -0.2 | 10.85 |
| $u_{91}$ | C(4)...H(27)  | 217.6(6)  | 10.9(Tied to $u_{87}$ ) | -0.2 | 10.84 |
| $u_{92}$ | C(32)...H(52) | 217.6(6)  | 10.9(Tied to $u_{87}$ ) | -0.2 | 10.84 |
| $u_{93}$ | C(3)...H(19)  | 217.6(6)  | 10.9(Tied to $u_{87}$ ) | -0.2 | 10.85 |

|           |               |            |                         |      |       |
|-----------|---------------|------------|-------------------------|------|-------|
| $u_{94}$  | C(31)...H(43) | 217.6(6)   | 10.9(Tied to $u_{87}$ ) | -0.1 | 10.85 |
| $u_{95}$  | C(32)...H(55) | 217.6(6)   | 10.9(Tied to $u_{87}$ ) | -0.2 | 10.87 |
| $u_{96}$  | C(4)...H(22)  | 217.6(6)   | 10.9(Tied to $u_{87}$ ) | -0.2 | 10.9  |
| $u_{97}$  | C(3)...H(15)  | 217.6(6)   | 10.9(Tied to $u_{87}$ ) | -0.2 | 10.87 |
| $u_{98}$  | C(31)...H(45) | 217.6(6)   | 10.8(Tied to $u_{87}$ ) | -0.2 | 10.76 |
| $u_{99}$  | C(3)...H(17)  | 217.6(6)   | 10.8(Tied to $u_{87}$ ) | -0.2 | 10.79 |
| $u_{100}$ | C(3)...H(14)  | 217.6(6)   | 10.8(Tied to $u_{87}$ ) | -0.1 | 10.76 |
| $u_{101}$ | C(31)...H(42) | 217.6(6)   | 10.8(Tied to $u_{87}$ ) | -0.2 | 10.73 |
| $u_{102}$ | C(32)...H(51) | 217.6(6)   | 10.8(Tied to $u_{87}$ ) | -0.2 | 10.76 |
| $u_{103}$ | C(4)...H(25)  | 217.6(6)   | 10.8(Tied to $u_{87}$ ) | -0.1 | 10.76 |
| $u_{104}$ | C(4)...H(23)  | 217.6(6)   | 10.7(Tied to $u_{87}$ ) | -0.1 | 10.65 |
| $u_{105}$ | C(3)...H(16)  | 217.6(6)   | 10.8(Tied to $u_{87}$ ) | -0.2 | 10.77 |
| $u_{106}$ | C(32)...H(54) | 217.6(6)   | 10.8(Tied to $u_{87}$ ) | -0.1 | 10.77 |
| $u_{107}$ | C(4)...H(20)  | 217.6(6)   | 10.8(Tied to $u_{87}$ ) | -0.1 | 10.78 |
| $u_{108}$ | C(31)...H(44) | 217.6(6)   | 10.8(Tied to $u_{87}$ ) | -0.2 | 10.8  |
| $u_{109}$ | C(31)...H(46) | 217.6(6)   | 10.9(Tied to $u_{87}$ ) | -0.2 | 10.82 |
| $u_{110}$ | C(4)...H(26)  | 217.6(6)   | 10.8(Tied to $u_{87}$ ) | -0.2 | 10.76 |
| $u_{111}$ | C(4)...H(28)  | 217.6(6)   | 10.8(Tied to $u_{87}$ ) | -0.1 | 10.76 |
| $u_{112}$ | C(32)...H(48) | 217.6(6)   | 10.8(Tied to $u_{87}$ ) | -0.1 | 10.8  |
| $u_{113}$ | C(32)...H(56) | 217.6(6)   | 10.8(Tied to $u_{87}$ ) | -0.2 | 10.75 |
| $u_{114}$ | C(32)...H(53) | 217.6(6)   | 10.8(Tied to $u_{87}$ ) | -0.1 | 10.74 |
| $u_{115}$ | C(3)...H(18)  | 217.6(6)   | 10.8(Tied to $u_{87}$ ) | -0.1 | 10.77 |
| $u_{116}$ | C(4)...H(21)  | 217.6(6)   | 10.8(Tied to $u_{87}$ ) | -0.1 | 10.8  |
| $u_{117}$ | C(32)...H(49) | 217.6(6)   | 10.8(Tied to $u_{87}$ ) | -0.1 | 10.8  |
| $u_{118}$ | P(1)-Si(2)    | 224.6(7)   | 7.97                    | 0.3  | 6.01  |
| $u_{119}$ | P(29)-Si(30)  | 225.0(7)   | 8.0(Tied to $u_{118}$ ) | 0.3  | 6.06  |
| $u_{120}$ | H(10)...H(21) | 380.0(46)  | 29.7(fixed)             | 6.8  | 29.74 |
| $u_{121}$ | H(46)...H(49) | 224.6(119) | 40.6(fixed)             | 9.5  | 40.58 |
| $u_{122}$ | H(18)...H(25) | 222.8(106) | 31.2(fixed)             | 7.0  | 31.19 |
| $u_{123}$ | P(29)...H(38) | 233.0(9)   | 11.8(fixed)             | 0.0  | 11.8  |
| $u_{124}$ | H(38)...H(49) | 229.5(61)  | 30.7(fixed)             | 4.2  | 30.73 |
| $u_{125}$ | P(1)...H(10)  | 234.5(9)   | 11.9(fixed)             | 0.0  | 11.91 |

|           |               |           |                          |      |       |
|-----------|---------------|-----------|--------------------------|------|-------|
| $u_{126}$ | H(10)...H(25) | 228.8(66) | 32.0(fixed)              | 4.3  | 31.99 |
| $u_{127}$ | H(38)...H(43) | 247.2(25) | 18.4(fixed)              | 0.5  | 18.36 |
| $u_{128}$ | H(10)...H(19) | 305.1(8)  | 18.2(fixed)              | 0.4  | 18.22 |
| $u_{129}$ | H(50)...H(55) | 256.9(45) | 24.2(fixed)              | 3.0  | 24.2  |
| $u_{130}$ | H(18)...H(23) | 228.7(90) | 33.0(fixed)              | 8.0  | 33    |
| $u_{131}$ | H(38)...H(47) | 249.0(17) | 18.7(fixed)              | 0.4  | 18.68 |
| $u_{132}$ | H(20)...H(22) | 382.2(33) | 24.3(fixed)              | 3.0  | 24.27 |
| $u_{133}$ | H(10)...H(16) | 247.7(27) | 18.5(fixed)              | 0.3  | 18.54 |
| $u_{134}$ | H(22)...H(24) | 315.2(40) | 24.1(fixed)              | 2.7  | 24.1  |
| $u_{135}$ | H(50)...H(52) | 252.7(35) | 24.1(fixed)              | 2.6  | 24.07 |
| $u_{136}$ | H(10)...H(15) | 251.7(24) | 18.7(fixed)              | 0.2  | 18.67 |
| $u_{137}$ | C(39)...C(40) | 252.7(22) | 7.7(Tied to $u_{146}$ )  | 0.0  | 7.43  |
| $u_{138}$ | C(11)...C(12) | 253.5(21) | 7.7(Tied to $u_{146}$ )  | -0.1 | 7.49  |
| $u_{139}$ | C(39)...C(41) | 249.8(9)  | 7.7(Tied to $u_{146}$ )  | 0.0  | 7.47  |
| $u_{140}$ | H(38)...H(44) | 250.9(27) | 19.1(fixed)              | 0.1  | 19.07 |
| $u_{141}$ | C(12)...C(13) | 249.8(9)  | 7.7(Tied to $u_{146}$ )  | 0.0  | 7.44  |
| $u_{142}$ | H(52)...H(55) | 258.8(35) | 24.7(fixed)              | 2.9  | 24.67 |
| $u_{143}$ | H(38)...H(46) | 247.2(19) | 19.0(fixed)              | 0.3  | 18.99 |
| $u_{144}$ | C(11)...C(13) | 249.8(9)  | 7.7(Tied to $u_{146}$ )  | -0.1 | 7.49  |
| $u_{145}$ | H(15)...H(19) | 304.8(41) | 24.7(Tied to $u_{146}$ ) | 3.4  | 24.71 |
| $u_{146}$ | C(41)...C(40) | 249.8(9)  | 7.9(Tied to $u_{146}$ )  | -0.1 | 7.6   |
| $u_{147}$ | H(43)...H(47) | 257.2(34) | 25.7(fixed)              | 3.9  | 25.74 |
| $u_{148}$ | H(24)...H(27) | 376.7(20) | 24.7(fixed)              | 2.4  | 24.71 |
| $u_{149}$ | C(36)...C(37) | 252.5(8)  | 7.9(Tied to $u_{146}$ )  | -0.1 | 7.64  |
| $u_{150}$ | C(8)...C(9)   | 252.5(8)  | 7.8(Tied to $u_{146}$ )  | -0.1 | 7.58  |
| $u_{151}$ | H(10)...H(18) | 249.9(19) | 18.5(fixed)              | 0.1  | 18.49 |
| $u_{152}$ | H(51)...H(56) | 250.0(38) | 25.4(fixed)              | 2.8  | 25.41 |
| $u_{153}$ | H(48)...H(54) | 261.5(55) | 25.2(fixed)              | 2.6  | 25.18 |
| $u_{154}$ | H(23)...H(28) | 249.1(38) | 24.4(fixed)              | 2.3  | 24.38 |
| $u_{155}$ | H(21)...H(25) | 302.7(41) | 25.0(fixed)              | 2.5  | 24.99 |
| $u_{156}$ | H(20)...H(26) | 302.4(50) | 25.3(fixed)              | 2.6  | 25.3  |
| $u_{157}$ | H(38)...H(48) | 263.4(66) | 33.7(fixed)              | 3.7  | 33.72 |



|           |               |           |                         |      |       |
|-----------|---------------|-----------|-------------------------|------|-------|
| $u_{158}$ | H(14)...H(17) | 320.8(39) | 26.8(fixed)             | 2.8  | 26.8  |
| $u_{159}$ | H(42)...H(45) | 260.3(40) | 27.7(fixed)             | 3.3  | 27.72 |
| $u_{160}$ | H(49)...H(53) | 256.2(39) | 25.4(fixed)             | 2.2  | 25.41 |
| $u_{161}$ | C(39)...H(50) | 275.2(31) | 16.2(fixed)             | 0.3  | 16.22 |
| $u_{162}$ | C(12)...H(27) | 284.9(35) | 16.6(fixed)             | 0.3  | 16.55 |
| $u_{163}$ | C(40)...H(52) | 270.1(21) | 16.5(fixed)             | 0.3  | 16.5  |
| $u_{164}$ | C(41)...H(55) | 273.3(21) | 17.2(fixed)             | 0.3  | 17.2  |
| $u_{165}$ | C(13)...H(22) | 276.3(23) | 16.9(fixed)             | 0.3  | 16.94 |
| $u_{166}$ | C(11)...H(24) | 273.4(21) | 16.5(fixed)             | 0.2  | 16.48 |
| $u_{167}$ | C(9)...H(15)  | 274.1(20) | 17.3(fixed)             | 0.4  | 17.34 |
| $u_{168}$ | C(39)...H(51) | 269.4(23) | 17.0(fixed)             | 0.2  | 17.04 |
| $u_{169}$ | C(40)...H(54) | 277.2(36) | 17.5(fixed)             | 0.3  | 17.52 |
| $u_{170}$ | C(36)...H(47) | 275.5(21) | 18.0(fixed)             | 0.3  | 17.99 |
| $u_{171}$ | C(13)...H(28) | 268.6(23) | 17.0(fixed)             | 0.2  | 16.96 |
| $u_{172}$ | C(40)...H(55) | 278.9(31) | 17.3(fixed)             | 0.2  | 17.32 |
| $u_{173}$ | C(11)...H(20) | 277.1(35) | 17.3(fixed)             | 0.2  | 17.3  |
| $u_{174}$ | C(12)...H(24) | 276.6(21) | 16.4(fixed)             | 0.1  | 16.43 |
| $u_{175}$ | C(12)...H(25) | 272.2(23) | 16.3(fixed)             | 0.2  | 16.34 |
| $u_{176}$ | P(1)...C(12)  | 272.3(9)  | 7.47                    | 0.0  | 8.32  |
| $u_{177}$ | C(11)...H(22) | 348.5(17) | 17.1(fixed)             | 0.1  | 17.08 |
| $u_{178}$ | C(41)...H(49) | 271.7(23) | 17.0(fixed)             | 0.1  | 16.99 |
| $u_{179}$ | H(38)...C(40) | 275.7(42) | 23.9(fixed)             | 2.4  | 23.86 |
| $u_{180}$ | C(8)...H(17)  | 279.3(21) | 17.9(fixed)             | 0.1  | 17.93 |
| $u_{181}$ | C(37)...H(43) | 278.6(21) | 17.7(fixed)             | 0.2  | 17.74 |
| $u_{182}$ | C(39)...H(52) | 279.5(22) | 17.0(fixed)             | 0.0  | 17.02 |
| $u_{183}$ | C(41)...H(50) | 277.1(22) | 16.7(fixed)             | 0.0  | 16.71 |
| $u_{184}$ | C(8)...H(19)  | 276.3(24) | 17.1(fixed)             | 0.1  | 17.13 |
| $u_{185}$ | C(13)...H(18) | 265.0(76) | 23.3(fixed)             | 6.0  | 23.31 |
| $u_{186}$ | P(29)...C(39) | 273.8(9)  | 7.5(Tied to $u_{176}$ ) | -0.1 | 8.43  |
| $u_{187}$ | C(13)...H(27) | 345.4(9)  | 17.2(fixed)             | 0.0  | 17.17 |
| $u_{188}$ | C(37)...H(42) | 276.9(23) | 18.7(fixed)             | 0.1  | 18.68 |
| $u_{189}$ | C(39)...H(48) | 281.0(36) | 16.9(fixed)             | 0.0  | 16.92 |

|           |                |           |                         |      |       |
|-----------|----------------|-----------|-------------------------|------|-------|
| $u_{190}$ | C(41)...H(56)  | 275.4(23) | 17.6(fixed)             | 0.1  | 17.64 |
| $u_{191}$ | C(11)...H(23)  | 275.3(24) | 16.3(fixed)             | 0.0  | 16.29 |
| $u_{192}$ | C(13)...H(21)  | 272.5(21) | 17.5(fixed)             | 0.1  | 17.51 |
| $u_{193}$ | P(29)...C(40)  | 276.9(9)  | 7.5(Tied to $u_{176}$ ) | 0.0  | 8.45  |
| $u_{194}$ | P(1)...C(8)    | 277.8(8)  | 7.5(Tied to $u_{176}$ ) | -0.2 | 8.42  |
| $u_{195}$ | C(36)...H(45)  | 280.1(24) | 18.8(fixed)             | 0.1  | 18.84 |
| $u_{196}$ | C(12)...H(26)  | 273.4(31) | 17.2(fixed)             | 0.0  | 17.19 |
| $u_{197}$ | Cl(35)...H(45) | 274.0(59) | 28.9(fixed)             | 15.1 | 28.86 |
| $u_{198}$ | P(1)...C(11)   | 277.8(9)  | 7.6(Tied to $u_{176}$ ) | 0.0  | 8.61  |
| $u_{199}$ | P(29)...C(36)  | 279.1(8)  | 7.4(Tied to $u_{176}$ ) | -0.1 | 8.4   |
| $u_{200}$ | Cl(34)...H(56) | 264.1(78) | 25.3(fixed)             | 8.4  | 25.34 |
| $u_{201}$ | C(9)...H(14)   | 281.5(24) | 18.3(fixed)             | -0.1 | 18.26 |
| $u_{202}$ | C(40)...H(53)  | 278.8(24) | 17.2(fixed)             | 0.0  | 17.23 |
| $u_{203}$ | Cl(7)...H(23)  | 282.2(57) | 25.5(fixed)             | 7.2  | 25.45 |
| $u_{204}$ | C(31)...H(49)  | 279.5(38) | 21.2(fixed)             | 2.7  | 21.19 |
| $u_{205}$ | C(4)...H(10)   | 283.0(25) | 18.4(fixed)             | 0.8  | 18.35 |
| $u_{206}$ | C(3)...H(25)   | 279.4(38) | 23.3(fixed)             | 2.7  | 23.32 |
| $u_{207}$ | Cl(33)...H(42) | 277.8(83) | 28.9(fixed)             | 12.7 | 28.94 |
| $u_{208}$ | P(29)...H(48)  | 285.4(23) | 18.1(fixed)             | 0.5  | 18.09 |
| $u_{209}$ | P(29)...H(44)  | 285.8(21) | 18.6(fixed)             | 0.8  | 18.62 |
| $u_{210}$ | P(1)...H(26)   | 375.7(9)  | 18.5(fixed)             | 0.5  | 18.51 |
| $u_{211}$ | P(1)...H(20)   | 287.2(24) | 18.4(fixed)             | 0.4  | 18.37 |
| $u_{212}$ | C(37)...H(53)  | 268.3(58) | 28.6(fixed)             | 6.9  | 28.59 |
| $u_{213}$ | P(29)...H(54)  | 286.6(24) | 18.6(fixed)             | 0.5  | 18.64 |
| $u_{214}$ | P(1)...C(13)   | 289.5(8)  | 7.1(Tied to $u_{176}$ ) | 0.0  | 8     |
| $u_{215}$ | Cl(5)...H(17)  | 461.0(76) | 28.2(fixed)             | 5.3  | 28.23 |
| $u_{216}$ | P(1)...H(16)   | 290.0(22) | 18.5(fixed)             | 0.6  | 18.48 |
| $u_{217}$ | P(29)...C(41)  | 291.4(8)  | 7.2(Tied to $u_{176}$ ) | 0.0  | 8.15  |
| $u_{218}$ | P(1)...H(21)   | 372.6(8)  | 18.7(fixed)             | 0.3  | 18.67 |
| $u_{219}$ | C(37)...H(49)  | 291.2(83) | 28.2(fixed)             | 4.3  | 28.19 |
| $u_{220}$ | C(9)...H(25)   | 287.4(72) | 24.5(fixed)             | 3.7  | 24.46 |
| $u_{221}$ | P(1)...C(9)    | 292.9(8)  | 7.1(Tied to $u_{176}$ ) | -0.1 | 8     |

|           |                |           |                         |      |       |
|-----------|----------------|-----------|-------------------------|------|-------|
| $u_{222}$ | P(29)...C(37)  | 293.7(8)  | 7.1(Tied to $u_{176}$ ) | -0.1 | 8.04  |
| $u_{223}$ | H(10)...C(12)  | 295.3(46) | 23.6(fixed)             | 1.8  | 23.57 |
| $u_{224}$ | C(41)...H(46)  | 278.9(59) | 26.5(fixed)             | 9.0  | 26.52 |
| $u_{225}$ | H(20)...H(27)  | 265.2(54) | 27.9(fixed)             | -0.5 | 27.93 |
| $u_{226}$ | H(50)...H(54)  | 307.5(50) | 27.8(fixed)             | -0.6 | 27.78 |
| $u_{227}$ | P(29)...H(56)  | 293.3(24) | 19.3(fixed)             | 0.2  | 19.31 |
| $u_{228}$ | H(49)...H(52)  | 298.1(41) | 26.7(fixed)             | -0.4 | 26.72 |
| $u_{229}$ | H(51)...H(55)  | 299.6(42) | 28.4(fixed)             | -0.7 | 28.38 |
| $u_{230}$ | H(24)...H(28)  | 298.4(41) | 26.5(fixed)             | -0.5 | 26.52 |
| $u_{231}$ | Cl(5)...H(14)  | 298.9(82) | 34.3(fixed)             | 6.2  | 34.28 |
| $u_{232}$ | Si(30)...H(51) | 295.4(36) | 23.4(fixed)             | 3.1  | 23.38 |
| $u_{233}$ | Cl(6)...H(28)  | 290.0(83) | 29.5(fixed)             | 4.7  | 29.47 |
| $u_{234}$ | H(15)...H(17)  | 256.5(34) | 29.8(fixed)             | -0.7 | 29.82 |
| $u_{235}$ | H(19)...H(28)  | 253.8(38) | 26.7(fixed)             | -0.6 | 26.71 |
| $u_{236}$ | C(6)...C(16)   | 298.6(12) | 9.59                    | 0.2  | 9.41  |
| $u_{237}$ | H(7)...C(17)   | 294.6(54) | 25.2(fixed)             | 1.1  | 25.17 |
| $u_{238}$ | H(45)...H(53)  | 280.0(89) | 52.8(fixed)             | 5.7  | 52.81 |
| $u_{239}$ | H(38)...H(42)  | 305.7(14) | 12.7(fixed)             | -1.7 | 12.67 |
| $u_{240}$ | Si(1)...H(22)  | 295.3(45) | 24.4(fixed)             | 3.0  | 24.4  |
| $u_{241}$ | P(5)...H(14)   | 302.6(23) | 19.9(fixed)             | -0.1 | 19.87 |
| $u_{242}$ | H(7)...H(14)   | 306.1(14) | 12.7(fixed)             | -1.7 | 12.65 |
| $u_{243}$ | H(7)...H(10)   | 246.3(17) | 12.7(fixed)             | -1.6 | 12.7  |
| $u_{244}$ | H(38)...H(45)  | 305.2(8)  | 12.7(fixed)             | -1.8 | 12.67 |
| $u_{245}$ | H(42)...H(47)  | 308.0(40) | 31.7(fixed)             | -1.0 | 31.66 |
| $u_{246}$ | C(31)...C(32)  | 303.3(11) | 9.1(Tied to $u_{236}$ ) | 0.2  | 9.01  |
| $u_{247}$ | C(40)...H(46)  | 304.1(91) | 33.9(fixed)             | 5.9  | 33.87 |
| $u_{248}$ | P(29)...H(49)  | 302.9(24) | 16.8(fixed)             | 0.1  | 16.77 |
| $u_{249}$ | Cl(35)...H(51) | 294.5(90) | 35.8(fixed)             | 4.2  | 35.81 |
| $u_{250}$ | Cl(34)...H(51) | 317.4(94) | 37.2(fixed)             | 4.5  | 37.17 |
| $u_{251}$ | Si(1)...H(10)  | 445.1(23) | 26.6(fixed)             | 2.5  | 26.63 |
| $u_{252}$ | C(6)...H(27)   | 445.3(32) | 24.5(fixed)             | 2.7  | 24.54 |
| $u_{253}$ | P(5)...H(22)   | 307.7(24) | 17.3(fixed)             | 0.1  | 17.33 |

|           |                 |           |                          |      |       |
|-----------|-----------------|-----------|--------------------------|------|-------|
| $u_{254}$ | C(32)...H(38)   | 310.8(32) | 19.1(fixed)              | 0.5  | 19.07 |
| $u_{255}$ | C(32)...H(46)   | 304.2(40) | 24.6(fixed)              | 5.8  | 24.56 |
| $u_{256}$ | H(20)...H(27)   | 254.4(35) | 26.6(fixed)              | -1.0 | 26.61 |
| $u_{257}$ | H(48)...H(55)   | 318.9(49) | 27.1(fixed)              | -1.0 | 27.14 |
| $u_{258}$ | H(43)...H(45)   | 317.7(40) | 30.8(fixed)              | -1.4 | 30.82 |
| $u_{259}$ | Cl(4)...H(9)    | 302.1(75) | 36.7(fixed)              | 4.5  | 36.72 |
| $u_{260}$ | P(29)...H(42)   | 311.0(23) | 18.7(fixed)              | -0.2 | 18.69 |
| $u_{261}$ | P(5)...H(9)     | 309.2(21) | 16.9(fixed)              | 0.6  | 16.87 |
| $u_{262}$ | P(29)...H(53)   | 308.8(21) | 17.4(fixed)              | 0.4  | 17.44 |
| $u_{263}$ | P(5)...H(19)    | 310.4(22) | 17.0(fixed)              | 0.2  | 16.95 |
| $u_{264}$ | P(5)...H(18)    | 310.4(22) | 16.7(fixed)              | 0.2  | 16.65 |
| $u_{265}$ | H(52)...H(56)   | 318.2(39) | 27.7(fixed)              | -1.1 | 27.71 |
| $u_{266}$ | P(29)...H(46)   | 312.8(21) | 18.2(fixed)              | 0.6  | 18.16 |
| $u_{267}$ | H(23)...H(28)   | 375.7(28) | 27.0(fixed)              | -1.1 | 27.02 |
| $u_{268}$ | H(18)...H(24)   | 372.1(25) | 25.6(fixed)              | -1.1 | 25.61 |
| $u_{269}$ | H(11)...H(14)   | 261.4(40) | 28.7(fixed)              | -1.4 | 28.7  |
| $u_{270}$ | C(31)...C(40)   | 319.7(27) | 12.7(fixed)              | 0.6  | 12.69 |
| $u_{271}$ | H(50)...H(53)   | 319.6(40) | 25.9(fixed)              | -1.1 | 25.93 |
| $u_{272}$ | P(29)...H(51)   | 316.6(22) | 16.6(fixed)              | 0.2  | 16.61 |
| $u_{273}$ | Cl(35)...H(53)  | 322.6(86) | 40.5(fixed)              | 4.3  | 40.53 |
| $u_{274}$ | P(29)...H(45)   | 321.1(21) | 18.2(fixed)              | 0.2  | 18.18 |
| $u_{275}$ | P(5)...H(10)    | 386.8(8)  | 17.6(fixed)              | -0.1 | 17.58 |
| $u_{276}$ | C(31)...H(48)   | 329.6(54) | 25.9(fixed)              | 0.4  | 25.9  |
| $u_{277}$ | Si(1)...C(6)    | 325.9(7)  | 9.910                    | 0.1  | 9.86  |
| $u_{278}$ | Si(30)...H(45)  | 323.0(44) | 26.3(fixed)              | 5.4  | 26.31 |
| $u_{279}$ | Cl(2)...H(23)   | 436.7(54) | 37.3(fixed)              | 3.0  | 37.25 |
| $u_{280}$ | C(6)...C(17)    | 322.9(28) | 14.3(fixed)              | 0.6  | 14.29 |
| $u_{281}$ | Si(30)...C(31)  | 327.6(7)  | 9.2(Tied to $u_{277}$ )  | 0.1  | 9.12  |
| $u_{282}$ | Cl(33)...Cl(35) | 324.5(24) | 10.34                    | -0.1 | 10.15 |
| $u_{283}$ | Cl(34)...Cl(35) | 327.1(11) | 10.3(Tied to $u_{282}$ ) | -0.1 | 10.14 |
| $u_{284}$ | Cl(2)...Cl(4)   | 327.8(11) | 10.3(Tied to $u_{282}$ ) | -0.1 | 10.11 |
| $u_{285}$ | Cl(2)...Cl(3)   | 327.8(11) | 10.2(Tied to $u_{282}$ ) | -0.2 | 10.01 |

|           |                 |            |                          |      |       |
|-----------|-----------------|------------|--------------------------|------|-------|
| $u_{286}$ | Cl(33)...Cl(34) | 327.8(11)  | 10.3(Tied to $u_{282}$ ) | -0.2 | 10.12 |
| $u_{287}$ | Si(30)...C(32)  | 329.6(7)   | 9.7(Tied to $u_{277}$ )  | 0.1  | 9.64  |
| $u_{288}$ | Cl(3)...Cl(4)   | 326.5(24)  | 10.5(Tied to $u_{282}$ ) | -0.1 | 10.26 |
| $u_{289}$ | Cl(4)...H(10)   | 446.1(58)  | 40.6(fixed)              | 2.8  | 40.6  |
| $u_{290}$ | Cl(4)...H(22)   | 325.7(116) | 43.4(fixed)              | 3.8  | 43.37 |
| $u_{291}$ | C(8)...H(18)    | 319.6(80)  | 29.1(fixed)              | 2.4  | 29.14 |
| $u_{292}$ | Si(1)...C(16)   | 331.3(7)   | 9.5(Tied to $u_{277}$ )  | 0.1  | 9.49  |
| $u_{293}$ | Si(30)...H(42)  | 325.1(55)  | 28.8(fixed)              | 4.3  | 28.77 |
| $u_{294}$ | Si(1)...H(18)   | 334.6(48)  | 21.8(fixed)              | 2.4  | 21.83 |
| $u_{295}$ | H(11)...H(19)   | 379.8(86)  | 32.1(fixed)              | 3.7  | 32.14 |
| $u_{296}$ | C(31)...H(53)   | 326.8(44)  | 22.1(fixed)              | 2.4  | 22.07 |
| $u_{297}$ | Si(1)...H(9)    | 336.6(60)  | 27.4(fixed)              | 1.0  | 27.44 |
| $u_{298}$ | Si(1)...C(8)    | 337.9(24)  | 14.715                   | 0.6  | 14.51 |
| $u_{299}$ | Si(30)...C(41)  | 342.4(25)  | 16.216                   | 0.6  | 16.08 |
| $u_{300}$ | H(9)...C(16)    | 336.7(50)  | 20.7(fixed)              | 2.8  | 20.71 |
| $u_{301}$ | C(40)...H(56)   | 348.0(17)  | 10.4(fixed)              | -1.6 | 10.39 |
| $u_{302}$ | H(47)...H(49)   | 344.8(78)  | 33.8(fixed)              | 3.8  | 33.78 |
| $u_{303}$ | C(41)...H(54)   | 345.8(8)   | 10.4(fixed)              | -1.6 | 10.44 |
| $u_{304}$ | C(39)...H(49)   | 347.9(17)  | 10.4(fixed)              | -1.3 | 10.38 |
| $u_{305}$ | C(8)...C(17)    | 338.8(55)  | 16.6(fixed)              | 1.6  | 16.56 |
| $u_{306}$ | C(17)...H(26)   | 345.8(8)   | 10.4(fixed)              | -1.5 | 10.41 |
| $u_{307}$ | H(22)...C(25)   | 348.2(16)  | 10.4(fixed)              | -1.4 | 10.44 |
| $u_{308}$ | H(18)...C(25)   | 345.7(8)   | 10.3(fixed)              | -1.3 | 10.33 |
| $u_{309}$ | C(21)...H(27)   | 280.9(30)  | 10.4(fixed)              | -1.5 | 10.42 |
| $u_{310}$ | H(19)...C(21)   | 345.8(8)   | 10.4(fixed)              | -1.3 | 10.4  |
| $u_{311}$ | C(17)...H(23)   | 280.5(22)  | 10.4(fixed)              | -1.5 | 10.4  |
| $u_{312}$ | C(40)...H(51)   | 345.6(8)   | 10.5(fixed)              | -1.4 | 10.5  |
| $u_{313}$ | C(39)...H(53)   | 345.5(9)   | 10.4(fixed)              | -1.4 | 10.38 |
| $u_{314}$ | C(41)...H(48)   | 345.7(8)   | 10.4(fixed)              | -1.4 | 10.43 |
| $u_{315}$ | Cl(3)...P(5)    | 345.6(10)  | 12.19                    | -0.1 | 11.94 |
| $u_{316}$ | C(8)...H(13)    | 347.6(8)   | 10.5(fixed)              | -1.8 | 10.48 |
| $u_{317}$ | C(37)...H(44)   | 347.8(8)   | 10.5(fixed)              | -1.9 | 10.49 |

|           |                |           |                          |      |       |
|-----------|----------------|-----------|--------------------------|------|-------|
| $u_{318}$ | C(36)...H(46)  | 347.7(8)  | 10.6(fixed)              | -2.0 | 10.58 |
| $u_{319}$ | H(9)...C(12)   | 347.8(8)  | 10.4(fixed)              | -1.7 | 10.44 |
| $u_{320}$ | P(29)...Cl(33) | 347.3(10) | 11.8(Tied to $u_{315}$ ) | -0.1 | 11.64 |
| $u_{321}$ | Si(30)...H(56) | 332.0(58) | 22.2(fixed)              | 2.7  | 22.21 |
| $u_{322}$ | Si(1)...C(21)  | 341.8(35) | 17.0(Tied to $u_{298}$ ) | 0.3  | 16.79 |
| $u_{323}$ | Cl(2)...P(5)   | 348.6(10) | 11.7(Tied to $u_{315}$ ) | -0.2 | 11.57 |
| $u_{324}$ | P(29)...Cl(34) | 349.0(10) | 11.8(Tied to $u_{315}$ ) | -0.1 | 11.62 |
| $u_{325}$ | C(6)...C(25)   | 350.7(33) | 15.8(fixed)              | 0.0  | 15.84 |
| $u_{326}$ | H(7)...H(26)   | 352.9(66) | 32.3(fixed)              | -0.3 | 32.29 |
| $u_{327}$ | C(6)...H(18)   | 343.2(57) | 24.1(fixed)              | 0.3  | 24.1  |
| $u_{328}$ | Si(30)...H(53) | 353.1(58) | 30.8(fixed)              | 0.4  | 30.79 |
| $u_{329}$ | C(32)...C(37)  | 349.6(30) | 16.2(fixed)              | 1.0  | 16.15 |
| $u_{330}$ | H(7)...H(18)   | 345.1(77) | 30.2(fixed)              | -0.5 | 30.21 |
| $u_{331}$ | Cl(2)...C(21)  | 344.7(47) | 21.1(Tied to $u_{339}$ ) | 1.9  | 21.12 |
| $u_{332}$ | Cl(35)...C(41) | 353.3(67) | 28.4(Tied to $u_{334}$ ) | 2.3  | 28.05 |
| $u_{333}$ | H(46)...H(52)  | 344.2(58) | 32.2(fixed)              | 8.7  | 32.24 |
| $u_{334}$ | Cl(33)...C(36) | 355.0(68) | 23.423                   | 4.2  | 23.13 |
| $u_{335}$ | Si(1)...H(23)  | 446.9(34) | 30.8(fixed)              | -0.3 | 30.82 |
| $u_{336}$ | Cl(35)...C(37) | 361.1(52) | 22.2(Tied to $u_{334}$ ) | 5.0  | 21.9  |
| $u_{337}$ | C(37)...C(40)  | 363.2(65) | 21.8(fixed)              | 0.9  | 21.76 |
| $u_{338}$ | C(37)...C(41)  | 349.3(47) | 22.3(fixed)              | 2.5  | 22.29 |
| $u_{339}$ | Cl(4)...C(8)   | 352.0(52) | 27.929                   | 1.7  | 27.97 |
| $u_{340}$ | Cl(33)...H(44) | 357.1(98) | 52.3(fixed)              | 3.1  | 52.32 |
| $u_{341}$ | H(46)...H(51)  | 348.8(88) | 32.7(fixed)              | 5.6  | 32.65 |
| $u_{342}$ | H(50)...H(56)  | 376.4(28) | 17.5(fixed)              | -1.9 | 17.54 |
| $u_{343}$ | H(24)...H(27)  | 325.8(47) | 17.7(fixed)              | -1.8 | 17.68 |
| $u_{344}$ | H(49)...H(55)  | 377.1(28) | 18.3(fixed)              | -1.4 | 18.31 |
| $u_{345}$ | Si(30)...C(37) | 369.1(34) | 18.6(Tied to $u_{299}$ ) | 0.6  | 18.49 |
| $u_{346}$ | H(22)...H(28)  | 432.2(13) | 18.3(fixed)              | -1.5 | 18.34 |
| $u_{347}$ | H(48)...H(52)  | 372.9(20) | 17.6(fixed)              | -1.6 | 17.55 |
| $u_{348}$ | Cl(4)...P(5)   | 369.4(9)  | 10.5(Tied to $u_{315}$ ) | -0.1 | 10.4  |
| $u_{349}$ | Cl(34)...C(39) | 359.5(65) | 20.4(Tied to $u_{334}$ ) | 2.2  | 20.18 |

|           |                |            |                          |      |       |
|-----------|----------------|------------|--------------------------|------|-------|
| $u_{350}$ | H(18)...H(28)  | 375.1(24)  | 17.8(fixed)              | -1.4 | 17.81 |
| $u_{351}$ | H(50)...H(51)  | 374.4(23)  | 18.3(fixed)              | -1.7 | 18.29 |
| $u_{352}$ | H(20)...H(26)  | 375.5(22)  | 18.0(fixed)              | -1.8 | 18.02 |
| $u_{353}$ | Si(1)...H(14)  | 368.1(59)  | 27.0(fixed)              | 1.8  | 26.95 |
| $u_{354}$ | H(9)...H(20)   | 359.7(82)  | 25.7(fixed)              | 4.3  | 25.7  |
| $u_{355}$ | H(53)...H(55)  | 376.3(20)  | 18.0(fixed)              | -1.7 | 17.97 |
| $u_{356}$ | Si(30)...C(36) | 367.6(40)  | 21.3(Tied to $u_{299}$ ) | 0.1  | 21.16 |
| $u_{357}$ | P(29)...Cl(35) | 370.7(9)   | 10.6(Tied to $u_{315}$ ) | -0.1 | 10.5  |
| $u_{358}$ | H(20)...H(23)  | 260.0(35)  | 17.7(fixed)              | -1.8 | 17.67 |
| $u_{359}$ | Cl(3)...C(8)   | 376.2(74)  | 24.6(Tied to $u_{372}$ ) | 0.7  | 21.52 |
| $u_{360}$ | H(52)...H(54)  | 378.2(22)  | 18.3(fixed)              | -1.9 | 18.34 |
| $u_{361}$ | H(9)...H(15)   | 375.9(20)  | 18.1(fixed)              | -1.8 | 18.11 |
| $u_{362}$ | H(44)...H(47)  | 376.6(21)  | 18.6(fixed)              | -2.1 | 18.55 |
| $u_{363}$ | H(11)...H(13)  | 378.5(23)  | 18.5(fixed)              | -2.0 | 18.46 |
| $u_{364}$ | P(5)...H(28)   | 289.5(24)  | 10.9(fixed)              | -1.7 | 10.87 |
| $u_{365}$ | H(43)...H(46)  | 377.2(22)  | 18.9(fixed)              | -2.3 | 18.87 |
| $u_{366}$ | H(19)...H(24)  | 431.1(12)  | 18.3(fixed)              | -1.5 | 18.33 |
| $u_{367}$ | H(51)...H(54)  | 371.7(23)  | 18.0(fixed)              | -2.0 | 17.98 |
| $u_{368}$ | H(46)...H(48)  | 373.4(104) | 37.3(fixed)              | 2.1  | 37.26 |
| $u_{369}$ | P(29)...H(55)  | 373.9(8)   | 11.0(fixed)              | -1.9 | 10.96 |
| $u_{370}$ | H(49)...H(54)  | 378.9(34)  | 18.1(fixed)              | -1.6 | 18.12 |
| $u_{371}$ | H(19)...H(22)  | 371.0(23)  | 17.8(fixed)              | -1.5 | 17.82 |
| $u_{372}$ | Cl(4)...C(17)  | 377.1(47)  | 24.019                   | 2.3  | 20.97 |
| $u_{373}$ | P(29)...H(50)  | 375.7(9)   | 11.2(fixed)              | -1.4 | 11.18 |
| $u_{374}$ | C(31)...C(41)  | 367.2(30)  | 13.6(fixed)              | 0.2  | 13.55 |
| $u_{375}$ | H(19)...H(26)  | 374.1(23)  | 17.5(fixed)              | -1.9 | 17.53 |
| $u_{376}$ | P(29)...H(43)  | 375.9(9)   | 11.3(fixed)              | -2.0 | 11.33 |
| $u_{377}$ | H(22)...H(26)  | 380.0(32)  | 18.0(fixed)              | -1.8 | 18    |
| $u_{378}$ | H(53)...H(56)  | 372.7(25)  | 18.5(fixed)              | -1.6 | 18.51 |
| $u_{379}$ | P(5)...H(24)   | 284.1(22)  | 11.3(fixed)              | -1.6 | 11.29 |
| $u_{380}$ | H(18)...H(23)  | 319.4(39)  | 17.8(fixed)              | -1.7 | 17.82 |
| $u_{381}$ | P(5)...H(15)   | 376.1(8)   | 10.9(fixed)              | -2.0 | 10.92 |

|           |                |           |                          |      |       |
|-----------|----------------|-----------|--------------------------|------|-------|
| $u_{382}$ | Cl(3)...C(6)   | 378.6(34) | 19.3(Tied to $u_{372}$ ) | 0.4  | 16.88 |
| $u_{383}$ | H(48)...H(56)  | 379.8(34) | 18.3(fixed)              | -2.0 | 18.26 |
| $u_{384}$ | Cl(35)...H(46) | 378.5(91) | 51.1(fixed)              | 3.0  | 51.05 |
| $u_{385}$ | C(8)...C(16)   | 373.5(34) | 12.3(fixed)              | 0.2  | 12.28 |
| $u_{386}$ | H(10)...H(13)  | 376.8(22) | 18.5(fixed)              | -2.3 | 18.54 |
| $u_{387}$ | H(18)...H(27)  | 374.5(21) | 18.3(fixed)              | -1.5 | 18.26 |
| $u_{388}$ | H(49)...H(51)  | 374.8(23) | 17.9(fixed)              | -1.8 | 17.86 |
| $u_{389}$ | H(23)...H(27)  | 256.8(45) | 18.4(fixed)              | -1.9 | 18.35 |
| $u_{390}$ | H(42)...H(46)  | 378.3(23) | 19.2(fixed)              | -2.5 | 19.16 |
| $u_{391}$ | H(44)...H(45)  | 379.1(25) | 19.3(fixed)              | -2.3 | 19.34 |
| $u_{392}$ | H(38)...H(53)  | 364.1(72) | 27.4(fixed)              | 1.0  | 27.43 |
| $u_{393}$ | H(38)...H(50)  | 379.2(44) | 25.7(fixed)              | 0.5  | 25.67 |
| $u_{394}$ | H(13)...H(27)  | 535.4(68) | 40.0(fixed)              | 3.9  | 40.03 |
| $u_{395}$ | H(9)...H(14)   | 379.8(24) | 19.0(fixed)              | -2.1 | 19.01 |
| $u_{396}$ | H(7)...H(28)   | 226.9(61) | 27.0(fixed)              | 0.1  | 26.95 |
| $u_{397}$ | H(48)...H(53)  | 376.6(25) | 18.2(fixed)              | -1.6 | 18.23 |
| $u_{398}$ | H(47)...H(53)  | 359.1(65) | 28.2(fixed)              | 3.4  | 28.18 |
| $u_{399}$ | Cl(3)...C(12)  | 382.0(61) | 30.2(Tied to $u_{372}$ ) | 0.9  | 26.42 |
| $u_{400}$ | C(41)...H(45)  | 363.3(76) | 45.8(fixed)              | 1.4  | 45.83 |
| $u_{401}$ | H(46)...H(50)  | 375.4(95) | 38.5(fixed)              | 5.8  | 38.5  |
| $u_{402}$ | H(45)...H(49)  | 378.9(98) | 35.3(fixed)              | 0.3  | 35.33 |
| $u_{403}$ | Si(1)...C(17)  | 383.3(34) | 13.6(Tied to $u_{298}$ ) | 0.3  | 13.48 |
| $u_{404}$ | H(10)...H(18)  | 397.5(87) | 36.5(fixed)              | 1.5  | 36.53 |
| $u_{405}$ | P(5)...H(20)   | 385.5(8)  | 10.8(fixed)              | -1.4 | 10.78 |
| $u_{406}$ | H(10)...H(19)  | 332.8(67) | 27.7(fixed)              | 0.5  | 27.73 |
| $u_{407}$ | P(5)...H(11)   | 322.7(21) | 10.9(fixed)              | -1.7 | 10.9  |
| $u_{408}$ | P(29)...H(52)  | 386.9(8)  | 10.9(fixed)              | -1.5 | 10.89 |
| $u_{409}$ | P(29)...H(47)  | 387.6(8)  | 11.0(fixed)              | -1.9 | 10.98 |
| $u_{410}$ | C(32)...Cl(34) | 389.1(40) | 19.717                   | 0.7  | 17.67 |
| $u_{411}$ | H(7)...H(20)   | 384.1(51) | 28.3(fixed)              | -0.2 | 28.25 |
| $u_{412}$ | Cl(34)...C(41) | 398.1(76) | 32.9(Tied to $u_{410}$ ) | 0.6  | 29.48 |
| $u_{413}$ | Si(30)...C(39) | 380.6(38) | 13.5(Tied to $u_{299}$ ) | -0.1 | 13.45 |



|           |                |            |                          |      |       |
|-----------|----------------|------------|--------------------------|------|-------|
| $u_{414}$ | C(6)...H(26)   | 394.3(49)  | 26.0(fixed)              | -1.2 | 25.96 |
| $u_{415}$ | Si(30)...H(44) | 392.3(67)  | 39.4(fixed)              | -1.6 | 39.4  |
| $u_{416}$ | C(32)...H(45)  | 389.6(54)  | 32.2(fixed)              | -0.7 | 32.17 |
| $u_{417}$ | C(12)...H(27)  | 556.4(44)  | 30.7(fixed)              | 2.0  | 30.71 |
| $u_{418}$ | Si(30)...H(46) | 400.5(62)  | 38.6(fixed)              | -1.1 | 38.6  |
| $u_{419}$ | Cl(4)...C(16)  | 403.0(30)  | 22.1(Tied to $u_{372}$ ) | 0.4  | 19.33 |
| $u_{420}$ | Cl(35)...H(42) | 394.0(112) | 60.7(fixed)              | 2.6  | 60.7  |
| $u_{421}$ | H(38)...C(41)  | 396.8(53)  | 21.3(fixed)              | -0.5 | 21.26 |
| $u_{422}$ | C(31)...Cl(33) | 400.3(43)  | 20.9(Tied to $u_{410}$ ) | 0.0  | 18.7  |
| $u_{423}$ | Si(1)...C(12)  | 402.1(37)  | 16.6(Tied to $u_{298}$ ) | -0.6 | 16.45 |
| $u_{424}$ | C(31)...Cl(35) | 403.6(32)  | 22.2(Tied to $u_{410}$ ) | 0.7  | 19.89 |
| $u_{425}$ | C(37)...H(48)  | 409.9(81)  | 28.4(fixed)              | -1.0 | 28.43 |
| $u_{426}$ | Cl(33)...H(45) | 406.6(108) | 54.8(fixed)              | 2.1  | 54.84 |
| $u_{427}$ | Cl(4)...C(21)  | 408.0(89)  | 34.8(Tied to $u_{555}$ ) | 0.0  | 34.01 |
| $u_{428}$ | H(11)...H(18)  | 371.1(96)  | 33.4(fixed)              | 0.2  | 33.44 |
| $u_{429}$ | Si(1)...H(7)   | 409.9(17)  | 13.0(fixed)              | -1.0 | 12.97 |
| $u_{430}$ | H(45)...H(51)  | 387.1(89)  | 50.9(fixed)              | 2.2  | 50.93 |
| $u_{431}$ | H(11)...C(17)  | 411.7(73)  | 24.8(fixed)              | 0.2  | 24.81 |
| $u_{432}$ | H(9)...H(27)   | 499.6(81)  | 33.0(fixed)              | 2.0  | 33.03 |
| $u_{433}$ | Cl(3)...H(9)   | 421.5(99)  | 31.8(fixed)              | -1.2 | 31.81 |
| $u_{434}$ | Cl(2)...C(16)  | 413.0(34)  | 18.4(Tied to $u_{372}$ ) | -0.1 | 16.06 |
| $u_{435}$ | H(10)...C(17)  | 407.5(56)  | 23.9(fixed)              | -0.4 | 23.87 |
| $u_{436}$ | C(37)...H(51)  | 401.3(71)  | 28.7(fixed)              | 1.2  | 28.74 |
| $u_{437}$ | C(8)...H(27)   | 535.8(55)  | 26.8(fixed)              | 1.4  | 26.83 |
| $u_{438}$ | Si(30)...H(38) | 418.7(9)   | 12.1(fixed)              | -1.8 | 12.05 |
| $u_{439}$ | Cl(4)...C(6)   | 415.2(32)  | 22.1(Tied to $u_{372}$ ) | 0.1  | 19.34 |
| $u_{440}$ | C(32)...Cl(35) | 418.9(42)  | 22.0(Tied to $u_{410}$ ) | 0.3  | 19.72 |
| $u_{441}$ | Cl(4)...H(19)  | 424.3(84)  | 29.0(fixed)              | 0.8  | 29.04 |
| $u_{442}$ | Cl(34)...H(54) | 406.0(89)  | 32.2(fixed)              | -0.1 | 32.16 |
| $u_{443}$ | H(13)...H(26)  | 425.4(83)  | 40.1(fixed)              | 2.2  | 40.08 |
| $u_{444}$ | C(31)...H(50)  | 425.5(26)  | 14.7(fixed)              | -1.3 | 14.65 |
| $u_{445}$ | C(31)...H(51)  | 417.2(47)  | 21.5(fixed)              | -0.8 | 21.45 |

|                         |                |           |             |      |       |
|-------------------------|----------------|-----------|-------------|------|-------|
| <i>u</i> <sub>446</sub> | C(12)...C(16)  | 427.6(16) | 11.2(fixed) | -0.9 | 11.23 |
| <i>u</i> <sub>447</sub> | H(38)...H(54)  | 436.0(49) | 26.0(fixed) | 1.4  | 25.97 |
| <i>u</i> <sub>448</sub> | C(40)...H(47)  | 433.0(64) | 27.8(fixed) | -0.5 | 27.76 |
| <i>u</i> <sub>449</sub> | C(6)...H(20)   | 426.4(27) | 16.7(fixed) | -1.2 | 16.74 |
| <i>u</i> <sub>450</sub> | Si(1)...H(19)  | 428.9(54) | 22.1(fixed) | -0.6 | 22.11 |
| <i>u</i> <sub>451</sub> | C(36)...H(49)  | 427.4(40) | 23.1(fixed) | 0.7  | 23.12 |
| <i>u</i> <sub>452</sub> | H(13)...C(25)  | 431.3(64) | 30.0(fixed) | 1.1  | 29.95 |
| <i>u</i> <sub>453</sub> | H(18)...H(26)  | 431.3(12) | 13.7(fixed) | -2.5 | 13.65 |
| <i>u</i> <sub>454</sub> | H(19)...H(23)  | 378.9(22) | 13.7(fixed) | -2.5 | 13.69 |
| <i>u</i> <sub>455</sub> | H(48)...H(51)  | 431.2(12) | 13.8(fixed) | -2.5 | 13.75 |
| <i>u</i> <sub>456</sub> | H(53)...H(54)  | 431.1(12) | 13.7(fixed) | -2.6 | 13.66 |
| <i>u</i> <sub>457</sub> | H(49)...H(56)  | 432.2(13) | 13.6(fixed) | -2.6 | 13.64 |
| <i>u</i> <sub>458</sub> | H(22)...H(27)  | 376.8(28) | 13.7(fixed) | -2.6 | 13.69 |
| <i>u</i> <sub>459</sub> | H(38)...C(39)  | 436.3(32) | 19.7(fixed) | -0.1 | 19.74 |
| <i>u</i> <sub>460</sub> | C(31)...C(39)  | 432.1(12) | 9.9(fixed)  | -0.7 | 9.91  |
| <i>u</i> <sub>461</sub> | H(44)...H(46)  | 432.1(12) | 13.9(fixed) | -3.2 | 13.86 |
| <i>u</i> <sub>462</sub> | H(9)...H(13)   | 432.1(12) | 13.8(fixed) | -2.9 | 13.8  |
| <i>u</i> <sub>463</sub> | C(6)...C(21)   | 430.1(14) | 9.5(fixed)  | -0.8 | 9.46  |
| <i>u</i> <sub>464</sub> | H(7)...C(21)   | 432.1(23) | 17.8(fixed) | -0.7 | 17.82 |
| <i>u</i> <sub>465</sub> | C(12)...H(19)  | 427.2(43) | 25.2(fixed) | 1.4  | 25.16 |
| <i>u</i> <sub>466</sub> | H(13)...C(16)  | 435.0(34) | 20.4(fixed) | -0.2 | 20.44 |
| <i>u</i> <sub>467</sub> | Si(30)...H(54) | 425.3(56) | 24.7(fixed) | -1.4 | 24.66 |
| <i>u</i> <sub>468</sub> | H(10)...C(16)  | 457.4(33) | 20.4(fixed) | -1.2 | 20.37 |
| <i>u</i> <sub>469</sub> | C(40)...H(45)  | 438.1(78) | 31.0(fixed) | -2.5 | 30.99 |
| <i>u</i> <sub>470</sub> | Cl(3)...H(13)  | 439.7(85) | 36.3(fixed) | -1.4 | 36.28 |
| <i>u</i> <sub>471</sub> | C(32)...C(36)  | 439.4(10) | 9.5(fixed)  | -1.6 | 9.45  |
| <i>u</i> <sub>472</sub> | H(9)...C(25)   | 436.8(69) | 24.5(fixed) | 1.1  | 24.46 |
| <i>u</i> <sub>473</sub> | Cl(34)...H(53) | 454.0(90) | 37.9(fixed) | -1.6 | 37.85 |
| <i>u</i> <sub>474</sub> | C(31)...H(54)  | 446.6(29) | 18.9(fixed) | -0.3 | 18.89 |
| <i>u</i> <sub>475</sub> | C(6)...H(28)   | 307.2(47) | 18.8(fixed) | -1.9 | 18.76 |
| <i>u</i> <sub>476</sub> | Cl(34)...H(55) | 435.4(74) | 27.0(fixed) | 0.2  | 27    |
| <i>u</i> <sub>477</sub> | C(37)...H(52)  | 431.5(51) | 28.0(fixed) | 0.9  | 27.95 |

|                         |                |           |             |      |       |
|-------------------------|----------------|-----------|-------------|------|-------|
| <i>u</i> <sub>478</sub> | C(36)...H(48)  | 453.2(55) | 31.7(fixed) | -1.0 | 31.73 |
| <i>u</i> <sub>479</sub> | H(9)...H(22)   | 428.9(83) | 31.9(fixed) | 3.8  | 31.9  |
| <i>u</i> <sub>480</sub> | C(8)...H(20)   | 440.8(59) | 19.1(fixed) | -0.3 | 19.11 |
| <i>u</i> <sub>481</sub> | H(44)...H(48)  | 452.1(69) | 42.2(fixed) | 0.0  | 42.15 |
| <i>u</i> <sub>482</sub> | Si(30)...H(52) | 447.1(24) | 17.6(fixed) | -1.6 | 17.57 |
| <i>u</i> <sub>483</sub> | C(32)...H(47)  | 445.9(28) | 18.2(fixed) | -1.5 | 18.17 |
| <i>u</i> <sub>484</sub> | Si(1)...H(11)  | 301.1(36) | 16.9(fixed) | -2.0 | 16.88 |
| <i>u</i> <sub>485</sub> | Si(1)...H(13)  | 449.1(51) | 25.4(fixed) | -1.8 | 25.4  |
| <i>u</i> <sub>486</sub> | H(15)...H(27)  | 618.4(54) | 36.0(fixed) | 2.0  | 35.98 |
| <i>u</i> <sub>487</sub> | Cl(4)...H(20)  | 452.8(51) | 27.3(fixed) | 0.9  | 27.31 |
| <i>u</i> <sub>488</sub> | Cl(2)...H(24)  | 309.3(73) | 24.5(fixed) | -0.5 | 24.52 |
| <i>u</i> <sub>489</sub> | Cl(35)...H(47) | 449.1(57) | 24.0(fixed) | 0.6  | 24.03 |
| <i>u</i> <sub>490</sub> | C(12)...C(25)  | 454.3(43) | 20.8(fixed) | -0.9 | 20.82 |
| <i>u</i> <sub>491</sub> | Si(1)...H(24)  | 349.7(68) | 18.3(fixed) | -1.9 | 18.3  |
| <i>u</i> <sub>492</sub> | Cl(35)...H(52) | 445.7(75) | 32.1(fixed) | 0.0  | 32.13 |
| <i>u</i> <sub>493</sub> | C(37)...H(50)  | 451.4(68) | 26.1(fixed) | -0.5 | 26.09 |
| <i>u</i> <sub>494</sub> | Cl(33)...H(43) | 448.2(77) | 24.4(fixed) | -0.1 | 24.4  |
| <i>u</i> <sub>495</sub> | Cl(3)...H(11)  | 294.2(90) | 26.7(fixed) | -1.3 | 26.74 |
| <i>u</i> <sub>496</sub> | C(8)...C(25)   | 457.0(49) | 17.3(fixed) | -0.7 | 17.34 |
| <i>u</i> <sub>497</sub> | Cl(3)...H(15)  | 458.8(65) | 32.0(fixed) | -1.1 | 31.99 |
| <i>u</i> <sub>498</sub> | H(9)...C(21)   | 446.2(59) | 23.4(fixed) | 2.3  | 23.43 |
| <i>u</i> <sub>499</sub> | H(11)...C(16)  | 433.1(47) | 18.1(fixed) | -1.4 | 18.11 |
| <i>u</i> <sub>500</sub> | Cl(35)...C(36) | 454.8(79) | 39.045      | -1.5 | 43.66 |
| <i>u</i> <sub>501</sub> | H(11)...H(27)  | 617.2(53) | 34.4(fixed) | 1.7  | 34.39 |
| <i>u</i> <sub>502</sub> | C(6)...H(22)   | 452.5(35) | 17.6(fixed) | -0.7 | 17.61 |
| <i>u</i> <sub>503</sub> | C(36)...C(40)  | 463.5(26) | 15.8(fixed) | -1.4 | 15.82 |
| <i>u</i> <sub>504</sub> | C(41)...H(47)  | 447.1(50) | 22.3(fixed) | -0.9 | 22.3  |
| <i>u</i> <sub>505</sub> | Cl(4)...H(11)  | 313.2(84) | 32.0(fixed) | -0.9 | 31.96 |
| <i>u</i> <sub>506</sub> | C(32)...H(44)  | 460.4(21) | 18.7(fixed) | -2.1 | 18.67 |
| <i>u</i> <sub>507</sub> | H(47)...H(48)  | 470.2(87) | 36.7(fixed) | -1.7 | 36.7  |
| <i>u</i> <sub>508</sub> | Si(30)...C(40) | 462.5(12) | 10.3(fixed) | -0.8 | 10.32 |
| <i>u</i> <sub>509</sub> | Cl(2)...H(18)  | 455.6(99) | 30.0(fixed) | 0.7  | 30    |

|           |                |           |                          |      |       |
|-----------|----------------|-----------|--------------------------|------|-------|
| $u_{510}$ | C(31)...H(52)  | 457.9(29) | 17.3(fixed)              | -1.4 | 17.3  |
| $u_{511}$ | Cl(33)...C(37) | 461.6(81) | 34.7(Tied to $u_{500}$ ) | -2.1 | 38.84 |
| $u_{512}$ | H(43)...H(49)  | 464.9(46) | 27.6(fixed)              | 1.9  | 27.56 |
| $u_{513}$ | C(39)...H(46)  | 457.0(38) | 24.3(fixed)              | 4.1  | 24.34 |
| $u_{514}$ | C(6)...H(23)   | 514.0(14) | 17.3(fixed)              | -1.2 | 17.3  |
| $u_{515}$ | Si(1)...C(25)  | 464.7(10) | 9.9(fixed)               | -0.9 | 9.85  |
| $u_{516}$ | Cl(4)...H(23)  | 489.0(93) | 41.2(fixed)              | -2.4 | 41.24 |
| $u_{517}$ | C(12)...H(26)  | 470.2(65) | 32.5(fixed)              | -1.4 | 32.45 |
| $u_{518}$ | Cl(34)...H(52) | 477.0(82) | 33.5(fixed)              | -0.9 | 33.53 |
| $u_{519}$ | Si(30)...H(47) | 468.5(30) | 18.3(fixed)              | -2.5 | 18.31 |
| $u_{520}$ | H(15)...H(19)  | 464.9(51) | 29.8(fixed)              | 2.1  | 29.81 |
| $u_{521}$ | H(44)...H(49)  | 468.0(55) | 30.9(fixed)              | -1.1 | 30.89 |
| $u_{522}$ | H(45)...H(52)  | 453.8(84) | 49.7(fixed)              | -1.2 | 49.73 |
| $u_{523}$ | Si(30)...H(43) | 469.5(36) | 20.3(fixed)              | -2.7 | 20.27 |
| $u_{524}$ | H(7)...H(23)   | 498.4(27) | 21.6(fixed)              | -1.3 | 21.62 |
| $u_{525}$ | C(31)...H(56)  | 468.4(21) | 17.6(fixed)              | -1.2 | 17.58 |
| $u_{526}$ | H(38)...H(51)  | 467.0(54) | 23.3(fixed)              | -2.2 | 23.34 |
| $u_{527}$ | H(13)...H(19)  | 467.7(60) | 30.5(fixed)              | 0.5  | 30.49 |
| $u_{528}$ | H(38)...H(52)  | 470.6(56) | 26.4(fixed)              | -1.3 | 26.4  |
| $u_{529}$ | Si(1)...H(20)  | 475.8(31) | 17.3(fixed)              | -1.3 | 17.27 |
| $u_{530}$ | C(12)...C(17)  | 473.7(29) | 15.1(fixed)              | -0.7 | 15.13 |
| $u_{531}$ | Cl(35)...H(56) | 456.1(94) | 30.8(fixed)              | 1.0  | 30.77 |
| $u_{532}$ | H(14)...C(16)  | 476.4(19) | 17.8(fixed)              | -1.9 | 17.75 |
| $u_{533}$ | H(7)...H(22)   | 472.9(37) | 21.8(fixed)              | -1.4 | 21.77 |
| $u_{534}$ | C(36)...H(53)  | 466.1(45) | 25.8(fixed)              | 0.3  | 25.8  |
| $u_{535}$ | Si(30)...H(49) | 480.3(31) | 18.9(fixed)              | -0.5 | 18.86 |
| $u_{536}$ | Si(30)...H(55) | 473.6(37) | 17.8(fixed)              | -2.1 | 17.78 |
| $u_{537}$ | C(32)...H(42)  | 477.6(25) | 17.2(fixed)              | -2.3 | 17.15 |
| $u_{538}$ | C(40)...H(44)  | 484.5(42) | 27.1(fixed)              | -1.9 | 27.11 |
| $u_{539}$ | Cl(3)...H(7)   | 485.1(32) | 17.9(fixed)              | -1.2 | 17.9  |
| $u_{540}$ | Si(1)...H(26)  | 483.4(28) | 18.7(fixed)              | -0.9 | 18.69 |
| $u_{541}$ | H(14)...H(27)  | 630.6(37) | 31.6(fixed)              | -1.3 | 31.63 |

|           |                |            |                          |      |       |
|-----------|----------------|------------|--------------------------|------|-------|
| $u_{542}$ | Cl(4)...H(24)  | 459.2(111) | 38.3(fixed)              | -1.5 | 38.25 |
| $u_{543}$ | H(45)...H(48)  | 492.1(79)  | 30.2(fixed)              | -4.6 | 30.23 |
| $u_{544}$ | Cl(4)...H(7)   | 484.6(40)  | 22.9(fixed)              | -0.7 | 22.87 |
| $u_{545}$ | Si(1)...H(15)  | 493.3(34)  | 19.8(fixed)              | -2.6 | 19.82 |
| $u_{546}$ | H(38)...H(56)  | 494.8(28)  | 23.0(fixed)              | -1.8 | 23.02 |
| $u_{547}$ | H(43)...H(48)  | 505.5(66)  | 36.1(fixed)              | -0.9 | 36.09 |
| $u_{548}$ | H(42)...H(53)  | 479.4(66)  | 37.1(fixed)              | 0.9  | 37.07 |
| $u_{549}$ | H(7)...H(24)   | 471.9(23)  | 21.8(fixed)              | -1.1 | 21.83 |
| $u_{550}$ | Cl(33)...H(38) | 496.1(37)  | 18.6(fixed)              | -2.5 | 18.6  |
| $u_{551}$ | C(8)...H(22)   | 485.5(66)  | 24.2(fixed)              | 0.5  | 24.17 |
| $u_{552}$ | Si(30)...H(48) | 498.1(18)  | 16.9(fixed)              | -1.3 | 16.9  |
| $u_{553}$ | C(8)...C(21)   | 492.8(42)  | 14.5(fixed)              | -0.6 | 14.51 |
| $u_{554}$ | H(42)...H(49)  | 495.7(42)  | 23.7(fixed)              | -1.0 | 23.72 |
| $u_{555}$ | Cl(2)...C(17)  | 496.7(71)  | 21.822                   | -0.9 | 21.27 |
| $u_{556}$ | H(14)...H(19)  | 495.6(40)  | 25.2(fixed)              | -0.5 | 25.17 |
| $u_{557}$ | C(37)...C(39)  | 497.5(25)  | 14.8(fixed)              | -0.2 | 14.78 |
| $u_{558}$ | Si(1)...H(27)  | 546.7(11)  | 16.9(fixed)              | -1.2 | 16.9  |
| $u_{559}$ | C(12)...H(18)  | 494.6(55)  | 23.7(fixed)              | -1.1 | 23.73 |
| $u_{560}$ | Cl(35)...H(38) | 502.2(30)  | 18.9(fixed)              | -2.2 | 18.94 |
| $u_{561}$ | H(9)...H(28)   | 412.9(89)  | 29.3(fixed)              | 0.8  | 29.29 |
| $u_{562}$ | H(38)...H(55)  | 510.7(38)  | 23.5(fixed)              | -1.1 | 23.49 |
| $u_{563}$ | Cl(2)...C(6)   | 502.8(9)   | 11.9(Tied to $u_{607}$ ) | -1.2 | 10.85 |
| $u_{564}$ | Cl(33)...H(51) | 498.6(37)  | 23.8(fixed)              | 0.5  | 23.79 |
| $u_{565}$ | H(15)...C(16)  | 506.9(19)  | 15.7(fixed)              | -2.2 | 15.66 |
| $u_{566}$ | C(31)...Cl(34) | 504.0(9)   | 11.6(Tied to $u_{579}$ ) | -1.3 | 10.66 |
| $u_{567}$ | Cl(3)...C(16)  | 504.3(10)  | 12.0(Tied to $u_{607}$ ) | -1.0 | 10.93 |
| $u_{568}$ | H(10)...H(27)  | 593.0(64)  | 26.2(fixed)              | -1.3 | 26.24 |
| $u_{569}$ | H(11)...H(20)  | 516.0(78)  | 29.0(fixed)              | -1.5 | 28.99 |
| $u_{570}$ | C(32)...Cl(33) | 505.6(9)   | 12.0(Tied to $u_{579}$ ) | -1.5 | 11.05 |
| $u_{571}$ | Cl(3)...H(22)  | 498.3(43)  | 24.1(fixed)              | 0.3  | 24.08 |
| $u_{572}$ | Cl(4)...H(14)  | 498.3(87)  | 31.6(fixed)              | 0.2  | 31.56 |
| $u_{573}$ | Cl(3)...H(18)  | 506.6(43)  | 24.3(fixed)              | 1.1  | 24.27 |

|                         |                |           |             |      |       |
|-------------------------|----------------|-----------|-------------|------|-------|
| <i>u</i> <sub>574</sub> | H(13)...C(17)  | 507.8(41) | 21.9(fixed) | -1.3 | 21.88 |
| <i>u</i> <sub>575</sub> | H(46)...H(55)  | 506.7(48) | 29.2(fixed) | 5.0  | 29.15 |
| <i>u</i> <sub>576</sub> | Cl(2)...H(10)  | 646.0(20) | 26.5(fixed) | 0.7  | 26.49 |
| <i>u</i> <sub>577</sub> | C(40)...H(43)  | 518.7(34) | 21.1(fixed) | -1.2 | 21.14 |
| <i>u</i> <sub>578</sub> | H(46)...H(56)  | 499.6(45) | 26.2(fixed) | 2.9  | 26.17 |
| <i>u</i> <sub>579</sub> | Cl(35)...C(39) | 499.6(67) | 25.021      | -0.9 | 22.99 |
| <i>u</i> <sub>580</sub> | C(6)...H(24)   | 460.6(19) | 13.2(fixed) | -2.0 | 13.2  |
| <i>u</i> <sub>581</sub> | C(31)...H(55)  | 516.3(15) | 13.3(fixed) | -2.0 | 13.33 |
| <i>u</i> <sub>582</sub> | C(36)...C(41)  | 506.9(29) | 15.7(fixed) | -1.8 | 15.7  |
| <i>u</i> <sub>583</sub> | Cl(33)...H(56) | 503.3(62) | 27.7(fixed) | 0.7  | 27.67 |
| <i>u</i> <sub>584</sub> | H(46)...H(54)  | 511.9(47) | 27.3(fixed) | 2.0  | 27.26 |
| <i>u</i> <sub>585</sub> | H(47)...H(50)  | 517.0(70) | 32.0(fixed) | -2.0 | 31.95 |
| <i>u</i> <sub>586</sub> | H(11)...C(25)  | 533.0(44) | 25.3(fixed) | -1.6 | 25.34 |
| <i>u</i> <sub>587</sub> | C(32)...H(43)  | 519.0(14) | 13.7(fixed) | -2.5 | 13.65 |
| <i>u</i> <sub>588</sub> | H(9)...H(26)   | 514.4(60) | 26.5(fixed) | -1.5 | 26.47 |
| <i>u</i> <sub>589</sub> | Cl(34)...H(45) | 513.1(44) | 24.3(fixed) | 1.6  | 24.25 |
| <i>u</i> <sub>590</sub> | C(8)...H(26)   | 519.9(49) | 23.8(fixed) | -2.5 | 23.8  |
| <i>u</i> <sub>591</sub> | H(15)...C(25)  | 523.3(50) | 26.9(fixed) | -2.1 | 26.91 |
| <i>u</i> <sub>592</sub> | H(44)...H(54)  | 525.3(49) | 34.5(fixed) | 0.2  | 34.5  |
| <i>u</i> <sub>593</sub> | H(47)...H(51)  | 505.2(75) | 29.2(fixed) | -3.0 | 29.17 |
| <i>u</i> <sub>594</sub> | H(10)...H(20)  | 500.1(63) | 25.8(fixed) | -2.7 | 25.84 |
| <i>u</i> <sub>595</sub> | H(9)...H(24)   | 515.1(55) | 26.8(fixed) | 1.7  | 26.78 |
| <i>u</i> <sub>596</sub> | Cl(35)...H(44) | 518.6(89) | 52.5(fixed) | -5.7 | 52.54 |
| <i>u</i> <sub>597</sub> | H(10)...H(22)  | 585.6(67) | 34.6(fixed) | 0.5  | 34.59 |
| <i>u</i> <sub>598</sub> | H(14)...C(25)  | 525.4(40) | 23.6(fixed) | -3.0 | 23.56 |
| <i>u</i> <sub>599</sub> | Cl(35)...H(49) | 528.9(62) | 30.1(fixed) | 1.1  | 30.13 |
| <i>u</i> <sub>600</sub> | H(45)...H(50)  | 523.3(87) | 37.7(fixed) | -4.2 | 37.73 |
| <i>u</i> <sub>601</sub> | C(40)...H(42)  | 529.1(24) | 16.6(fixed) | -3.2 | 16.6  |
| <i>u</i> <sub>602</sub> | H(9)...H(23)   | 516.3(67) | 25.8(fixed) | -0.2 | 25.84 |
| <i>u</i> <sub>603</sub> | H(42)...H(48)  | 532.3(48) | 30.3(fixed) | -3.8 | 30.25 |
| <i>u</i> <sub>604</sub> | Cl(34)...H(42) | 519.6(52) | 24.6(fixed) | -0.3 | 24.58 |
| <i>u</i> <sub>605</sub> | Cl(2)...H(26)  | 525.1(52) | 28.6(fixed) | 0.1  | 28.59 |

|           |                |           |                          |      |       |
|-----------|----------------|-----------|--------------------------|------|-------|
| $u_{606}$ | Cl(2)...H(14)  | 530.1(57) | 31.2(fixed)              | 0.3  | 31.16 |
| $u_{607}$ | Cl(4)...C(12)  | 522.0(56) | 24.922                   | -1.4 | 22.71 |
| $u_{608}$ | H(14)...C(17)  | 528.1(28) | 17.2(fixed)              | -1.8 | 17.19 |
| $u_{609}$ | Cl(33)...H(46) | 530.5(86) | 48.1(fixed)              | -6.2 | 48.07 |
| $u_{610}$ | H(15)...C(17)  | 530.3(38) | 20.9(fixed)              | -1.2 | 20.87 |
| $u_{611}$ | H(14)...H(26)  | 533.4(64) | 35.4(fixed)              | -3.1 | 35.37 |
| $u_{612}$ | H(47)...H(52)  | 519.4(56) | 29.5(fixed)              | -2.2 | 29.45 |
| $u_{613}$ | H(10)...C(25)  | 519.9(55) | 19.2(fixed)              | -2.7 | 19.2  |
| $u_{614}$ | C(41)...H(42)  | 523.6(50) | 26.9(fixed)              | -1.5 | 26.94 |
| $u_{615}$ | H(13)...H(28)  | 376.1(81) | 32.6(fixed)              | -1.9 | 32.6  |
| $u_{616}$ | C(8)...H(28)   | 418.7(68) | 21.9(fixed)              | -2.0 | 21.87 |
| $u_{617}$ | Cl(2)...H(9)   | 526.5(55) | 28.1(fixed)              | -0.1 | 28.08 |
| $u_{618}$ | Cl(35)...H(43) | 532.1(82) | 44.2(fixed)              | -3.1 | 44.24 |
| $u_{619}$ | Cl(33)...H(47) | 534.9(86) | 39.9(fixed)              | -3.8 | 39.87 |
| $u_{620}$ | H(14)...H(18)  | 530.4(60) | 27.2(fixed)              | -1.0 | 27.22 |
| $u_{621}$ | C(39)...H(45)  | 527.9(48) | 30.6(fixed)              | -1.8 | 30.56 |
| $u_{622}$ | Cl(35)...C(40) | 540.0(45) | 23.9(Tied to $u_{630}$ ) | -0.3 | 22.05 |
| $u_{623}$ | Cl(2)...C(25)  | 535.0(29) | 20.118                   | -1.1 | 18.84 |
| $u_{624}$ | Cl(34)...C(40) | 540.4(36) | 18.4(Tied to $u_{630}$ ) | -0.7 | 16.96 |
| $u_{625}$ | C(37)...H(54)  | 539.7(31) | 19.0(fixed)              | -1.2 | 19.04 |
| $u_{626}$ | H(43)...H(53)  | 526.3(52) | 27.8(fixed)              | 0.3  | 27.81 |
| $u_{627}$ | Cl(33)...H(53) | 535.2(62) | 31.4(fixed)              | -1.3 | 31.42 |
| $u_{628}$ | C(37)...H(56)  | 530.1(33) | 18.5(fixed)              | -0.6 | 18.53 |
| $u_{629}$ | H(10)...C(21)  | 587.3(40) | 25.6(fixed)              | -1.5 | 25.58 |
| $u_{630}$ | Cl(33)...C(41) | 539.3(25) | 17.113                   | -1.5 | 15.79 |
| $u_{631}$ | Si(30)...H(50) | 544.6(12) | 14.0(fixed)              | -2.0 | 14.04 |
| $u_{632}$ | Cl(2)...C(8)   | 537.8(21) | 15.4(Tied to $u_{623}$ ) | -1.0 | 14.43 |
| $u_{633}$ | Cl(3)...H(23)  | 644.1(26) | 29.2(fixed)              | -1.7 | 29.18 |
| $u_{634}$ | H(13)...H(23)  | 637.4(41) | 29.7(fixed)              | 0.0  | 29.65 |
| $u_{635}$ | H(44)...H(53)  | 531.2(40) | 26.1(fixed)              | -2.7 | 26.12 |
| $u_{636}$ | Cl(3)...C(21)  | 536.5(26) | 16.1(Tied to $u_{623}$ ) | -1.5 | 15.07 |
| $u_{637}$ | C(36)...H(54)  | 548.4(34) | 24.4(fixed)              | -1.7 | 24.43 |

|           |                |           |                          |      |       |
|-----------|----------------|-----------|--------------------------|------|-------|
| $u_{638}$ | C(39)...H(44)  | 546.6(29) | 23.8(fixed)              | -2.2 | 23.83 |
| $u_{639}$ | H(15)...H(26)  | 548.8(73) | 37.5(fixed)              | -3.5 | 37.48 |
| $u_{640}$ | Si(1)...H(28)  | 499.5(20) | 13.7(fixed)              | -2.1 | 13.68 |
| $u_{641}$ | C(36)...C(39)  | 549.3(13) | 12.6(fixed)              | -2.5 | 12.56 |
| $u_{642}$ | C(12)...C(21)  | 549.9(11) | 11.0(fixed)              | -2.0 | 10.95 |
| $u_{643}$ | C(36)...H(51)  | 539.4(50) | 25.8(fixed)              | -2.3 | 25.79 |
| $u_{644}$ | Cl(4)...C(25)  | 553.7(25) | 19.4(Tied to $u_{623}$ ) | -1.1 | 18.14 |
| $u_{645}$ | H(13)...C(21)  | 552.8(31) | 21.5(fixed)              | -1.3 | 21.54 |
| $u_{646}$ | C(8)...H(23)   | 573.5(46) | 19.3(fixed)              | -2.0 | 19.29 |
| $u_{647}$ | H(42)...H(51)  | 536.1(71) | 36.5(fixed)              | -0.9 | 36.53 |
| $u_{648}$ | H(13)...H(18)  | 545.6(50) | 25.2(fixed)              | -2.5 | 25.24 |
| $u_{649}$ | Cl(3)...C(17)  | 553.7(30) | 16.3(Tied to $u_{623}$ ) | -0.6 | 15.23 |
| $u_{650}$ | Cl(34)...C(37) | 552.9(34) | 16.7(Tied to $u_{630}$ ) | -1.1 | 15.41 |
| $u_{651}$ | C(12)...H(28)  | 399.7(58) | 23.3(fixed)              | -3.4 | 23.32 |
| $u_{652}$ | H(45)...H(56)  | 539.2(59) | 33.9(fixed)              | -0.6 | 33.88 |
| $u_{653}$ | Cl(33)...C(39) | 551.8(43) | 19.5(Tied to $u_{630}$ ) | -1.8 | 17.97 |
| $u_{654}$ | C(12)...H(23)  | 639.0(15) | 20.8(fixed)              | -1.7 | 20.77 |
| $u_{655}$ | H(15)...H(18)  | 552.1(67) | 28.5(fixed)              | -1.7 | 28.45 |
| $u_{656}$ | C(41)...H(44)  | 553.4(24) | 18.9(fixed)              | -3.7 | 18.93 |
| $u_{657}$ | Cl(34)...C(36) | 554.5(36) | 17.7(Tied to $u_{630}$ ) | -2.4 | 16.3  |
| $u_{658}$ | Cl(34)...H(46) | 559.8(65) | 35.2(fixed)              | -0.4 | 35.22 |
| $u_{659}$ | Cl(34)...H(44) | 556.5(66) | 33.9(fixed)              | -2.7 | 33.91 |
| $u_{660}$ | C(37)...H(55)  | 564.8(33) | 20.4(fixed)              | -0.8 | 20.4  |
| $u_{661}$ | Cl(2)...C(12)  | 568.1(37) | 20.9(Tied to $u_{623}$ ) | -1.9 | 19.55 |
| $u_{662}$ | C(36)...H(50)  | 571.5(26) | 17.4(fixed)              | -3.8 | 17.39 |
| $u_{663}$ | Cl(2)...H(20)  | 563.8(76) | 26.9(fixed)              | -1.9 | 26.88 |
| $u_{664}$ | H(44)...H(56)  | 567.2(40) | 30.8(fixed)              | -2.4 | 30.77 |
| $u_{665}$ | Cl(3)...H(19)  | 571.2(53) | 25.5(fixed)              | -0.4 | 25.45 |
| $u_{666}$ | C(36)...H(56)  | 570.7(26) | 21.3(fixed)              | -2.7 | 21.28 |
| $u_{667}$ | Cl(2)...H(19)  | 570.9(69) | 23.6(fixed)              | -2.6 | 23.61 |
| $u_{668}$ | Cl(2)...H(7)   | 573.5(16) | 14.6(fixed)              | -2.2 | 14.62 |
| $u_{669}$ | C(8)...H(24)   | 543.8(38) | 18.1(fixed)              | -1.8 | 18.13 |



|                         |                |           |             |      |       |
|-------------------------|----------------|-----------|-------------|------|-------|
| <i>u</i> <sub>670</sub> | C(12)...H(20)  | 575.4(29) | 18.6(fixed) | -2.8 | 18.57 |
| <i>u</i> <sub>671</sub> | Cl(33)...H(54) | 568.5(68) | 31.5(fixed) | -2.1 | 31.46 |
| <i>u</i> <sub>672</sub> | Cl(34)...H(38) | 576.8(14) | 14.7(fixed) | -2.1 | 14.71 |
| <i>u</i> <sub>673</sub> | Cl(34)...H(48) | 574.6(35) | 20.5(fixed) | -1.3 | 20.48 |
| <i>u</i> <sub>674</sub> | Cl(35)...H(55) | 567.9(77) | 30.1(fixed) | -1.9 | 30.13 |
| <i>u</i> <sub>675</sub> | C(12)...H(22)  | 576.9(29) | 18.2(fixed) | -2.1 | 18.17 |
| <i>u</i> <sub>676</sub> | H(14)...C(21)  | 579.0(25) | 21.0(fixed) | -2.3 | 20.96 |
| <i>u</i> <sub>677</sub> | H(14)...H(23)  | 677.4(24) | 30.1(fixed) | -1.9 | 30.05 |
| <i>u</i> <sub>678</sub> | H(11)...H(26)  | 584.8(41) | 30.4(fixed) | -3.9 | 30.39 |
| <i>u</i> <sub>679</sub> | H(10)...H(23)  | 660.8(46) | 29.7(fixed) | -2.5 | 29.71 |
| <i>u</i> <sub>680</sub> | Cl(2)...H(13)  | 587.8(57) | 32.0(fixed) | -2.3 | 31.99 |
| <i>u</i> <sub>681</sub> | Cl(35)...H(54) | 572.9(64) | 25.4(fixed) | -3.3 | 25.38 |
| <i>u</i> <sub>682</sub> | H(10)...H(26)  | 587.5(60) | 25.2(fixed) | -3.9 | 25.17 |
| <i>u</i> <sub>683</sub> | C(41)...H(43)  | 580.4(34) | 18.5(fixed) | -2.6 | 18.51 |
| <i>u</i> <sub>684</sub> | H(45)...H(54)  | 580.1(42) | 28.2(fixed) | -3.5 | 28.17 |
| <i>u</i> <sub>685</sub> | Cl(4)...H(27)  | 611.9(34) | 21.0(fixed) | -1.4 | 20.99 |
| <i>u</i> <sub>686</sub> | C(39)...H(42)  | 582.8(25) | 19.7(fixed) | -3.5 | 19.65 |
| <i>u</i> <sub>687</sub> | H(44)...H(50)  | 592.9(44) | 29.3(fixed) | -4.7 | 29.33 |
| <i>u</i> <sub>688</sub> | H(11)...H(28)  | 506.3(59) | 30.9(fixed) | -2.9 | 30.91 |
| <i>u</i> <sub>689</sub> | Cl(34)...H(49) | 591.1(40) | 21.3(fixed) | -1.8 | 21.31 |
| <i>u</i> <sub>690</sub> | H(44)...H(51)  | 583.0(45) | 28.5(fixed) | -4.1 | 28.51 |
| <i>u</i> <sub>691</sub> | H(11)...C(21)  | 530.9(61) | 18.1(fixed) | -2.8 | 18.12 |
| <i>u</i> <sub>692</sub> | Cl(34)...H(50) | 597.3(46) | 22.3(fixed) | -1.1 | 22.3  |
| <i>u</i> <sub>693</sub> | H(42)...H(54)  | 593.0(38) | 29.5(fixed) | -3.8 | 29.46 |
| <i>u</i> <sub>694</sub> | C(39)...H(47)  | 595.7(25) | 17.6(fixed) | -2.9 | 17.63 |
| <i>u</i> <sub>695</sub> | H(42)...H(56)  | 585.1(44) | 27.9(fixed) | -2.4 | 27.85 |
| <i>u</i> <sub>696</sub> | Cl(4)...H(15)  | 588.6(61) | 29.4(fixed) | -2.5 | 29.44 |
| <i>u</i> <sub>697</sub> | H(11)...H(22)  | 507.2(86) | 26.1(fixed) | -2.3 | 26.12 |
| <i>u</i> <sub>698</sub> | H(14)...H(22)  | 591.2(47) | 27.2(fixed) | -1.5 | 27.21 |
| <i>u</i> <sub>699</sub> | H(13)...H(22)  | 596.7(31) | 24.7(fixed) | -2.6 | 24.71 |
| <i>u</i> <sub>700</sub> | Cl(4)...H(13)  | 593.5(51) | 24.2(fixed) | -3.4 | 24.18 |
| <i>u</i> <sub>701</sub> | Cl(4)...H(26)  | 604.2(34) | 22.6(fixed) | -2.5 | 22.61 |

|                         |                |           |             |      |       |
|-------------------------|----------------|-----------|-------------|------|-------|
| <i>u</i> <sub>702</sub> | H(13)...H(20)  | 602.3(47) | 26.2(fixed) | -3.1 | 26.21 |
| <i>u</i> <sub>703</sub> | Cl(35)...H(48) | 605.7(38) | 22.6(fixed) | -2.1 | 22.57 |
| <i>u</i> <sub>704</sub> | Cl(2)...H(28)  | 600.9(27) | 23.0(fixed) | -2.1 | 23.04 |
| <i>u</i> <sub>705</sub> | Cl(2)...H(27)  | 602.8(38) | 21.6(fixed) | -2.9 | 21.64 |
| <i>u</i> <sub>706</sub> | Cl(4)...H(28)  | 586.1(34) | 23.9(fixed) | -1.5 | 23.94 |
| <i>u</i> <sub>707</sub> | Cl(35)...H(50) | 608.3(55) | 27.6(fixed) | -1.2 | 27.57 |
| <i>u</i> <sub>708</sub> | H(45)...H(55)  | 598.8(60) | 36.8(fixed) | -3.0 | 36.77 |
| <i>u</i> <sub>709</sub> | C(36)...H(52)  | 604.0(28) | 17.5(fixed) | -4.0 | 17.51 |
| <i>u</i> <sub>710</sub> | H(15)...H(28)  | 452.0(66) | 30.7(fixed) | -4.4 | 30.66 |
| <i>u</i> <sub>711</sub> | H(43)...H(50)  | 623.3(36) | 23.3(fixed) | -3.6 | 23.26 |
| <i>u</i> <sub>712</sub> | Cl(3)...C(25)  | 616.6(12) | 12.9(fixed) | -1.7 | 12.88 |
| <i>u</i> <sub>713</sub> | H(10)...H(28)  | 462.7(78) | 23.0(fixed) | -4.4 | 23.02 |
| <i>u</i> <sub>714</sub> | Cl(33)...C(40) | 619.4(14) | 12.5(fixed) | -2.4 | 12.48 |
| <i>u</i> <sub>715</sub> | H(47)...H(54)  | 631.1(37) | 23.3(fixed) | -3.3 | 23.32 |
| <i>u</i> <sub>716</sub> | Cl(3)...H(26)  | 623.9(29) | 22.4(fixed) | -1.7 | 22.38 |
| <i>u</i> <sub>717</sub> | H(10)...H(24)  | 641.6(34) | 27.1(fixed) | -3.4 | 27.08 |
| <i>u</i> <sub>718</sub> | H(43)...H(54)  | 636.4(41) | 26.6(fixed) | -3.1 | 26.58 |
| <i>u</i> <sub>719</sub> | H(15)...H(20)  | 628.2(39) | 25.1(fixed) | -3.3 | 25.11 |
| <i>u</i> <sub>720</sub> | Cl(3)...H(27)  | 711.9(11) | 22.3(fixed) | -1.1 | 22.33 |
| <i>u</i> <sub>721</sub> | H(14)...H(28)  | 486.6(54) | 24.3(fixed) | -5.7 | 24.28 |
| <i>u</i> <sub>722</sub> | Cl(33)...H(49) | 627.5(39) | 21.6(fixed) | -2.0 | 21.57 |
| <i>u</i> <sub>723</sub> | Cl(33)...H(48) | 631.0(26) | 22.1(fixed) | -2.2 | 22.05 |
| <i>u</i> <sub>724</sub> | H(43)...H(51)  | 622.9(54) | 26.9(fixed) | -4.0 | 26.87 |
| <i>u</i> <sub>725</sub> | H(13)...H(24)  | 544.2(46) | 24.8(fixed) | -2.8 | 24.76 |
| <i>u</i> <sub>726</sub> | C(39)...H(43)  | 638.6(18) | 15.8(fixed) | -3.9 | 15.82 |
| <i>u</i> <sub>727</sub> | H(42)...H(50)  | 635.4(25) | 18.2(fixed) | -5.8 | 18.15 |
| <i>u</i> <sub>728</sub> | C(12)...H(24)  | 557.0(25) | 14.6(fixed) | -3.6 | 14.6  |
| <i>u</i> <sub>729</sub> | H(14)...H(20)  | 634.5(26) | 18.8(fixed) | -4.3 | 18.83 |
| <i>u</i> <sub>730</sub> | H(42)...H(52)  | 627.4(49) | 27.4(fixed) | -4.4 | 27.39 |
| <i>u</i> <sub>731</sub> | H(15)...C(21)  | 639.5(13) | 14.0(fixed) | -3.9 | 14.01 |
| <i>u</i> <sub>732</sub> | C(36)...H(55)  | 644.1(14) | 14.6(fixed) | -4.7 | 14.61 |
| <i>u</i> <sub>733</sub> | H(47)...H(56)  | 635.0(30) | 19.7(fixed) | -4.0 | 19.69 |

|                         |                |           |             |      |       |
|-------------------------|----------------|-----------|-------------|------|-------|
| <i>u</i> <sub>734</sub> | H(44)...H(55)  | 646.5(31) | 25.5(fixed) | -5.0 | 25.51 |
| <i>u</i> <sub>735</sub> | H(11)...H(23)  | 621.5(65) | 20.5(fixed) | -4.4 | 20.46 |
| <i>u</i> <sub>736</sub> | Cl(33)...H(52) | 646.3(23) | 17.1(fixed) | -4.2 | 17.13 |
| <i>u</i> <sub>737</sub> | Cl(2)...H(11)  | 504.3(36) | 16.4(fixed) | -3.9 | 16.39 |
| <i>u</i> <sub>738</sub> | Cl(3)...H(24)  | 528.5(54) | 16.7(fixed) | -4.0 | 16.69 |
| <i>u</i> <sub>739</sub> | H(44)...H(52)  | 649.5(24) | 20.2(fixed) | -5.9 | 20.19 |
| <i>u</i> <sub>740</sub> | Cl(3)...H(20)  | 655.8(29) | 17.6(fixed) | -2.8 | 17.57 |
| <i>u</i> <sub>741</sub> | H(15)...H(23)  | 723.1(20) | 21.8(fixed) | -4.5 | 21.8  |
| <i>u</i> <sub>742</sub> | H(47)...H(55)  | 659.5(34) | 23.0(fixed) | -3.5 | 23.01 |
| <i>u</i> <sub>743</sub> | Cl(34)...H(47) | 658.1(30) | 16.4(fixed) | -4.7 | 16.44 |
| <i>u</i> <sub>744</sub> | Cl(33)...H(55) | 654.1(41) | 19.8(fixed) | -4.5 | 19.81 |
| <i>u</i> <sub>745</sub> | H(11)...H(24)  | 572.1(59) | 23.2(fixed) | -3.8 | 23.18 |
| <i>u</i> <sub>746</sub> | Cl(34)...H(43) | 660.8(33) | 16.9(fixed) | -5.4 | 16.94 |
| <i>u</i> <sub>747</sub> | Cl(2)...H(15)  | 669.6(35) | 20.9(fixed) | -4.8 | 20.92 |
| <i>u</i> <sub>748</sub> | H(15)...H(22)  | 666.0(35) | 19.7(fixed) | -4.2 | 19.72 |
| <i>u</i> <sub>749</sub> | H(43)...H(56)  | 668.9(25) | 22.0(fixed) | -4.9 | 22.02 |
| <i>u</i> <sub>750</sub> | H(43)...H(52)  | 671.1(35) | 21.9(fixed) | -4.4 | 21.88 |
| <i>u</i> <sub>751</sub> | H(14)...H(24)  | 577.1(38) | 21.5(fixed) | -4.7 | 21.52 |
| <i>u</i> <sub>752</sub> | H(42)...H(55)  | 680.6(26) | 20.1(fixed) | -5.9 | 20.14 |
| <i>u</i> <sub>753</sub> | Cl(3)...H(28)  | 627.3(28) | 14.4(fixed) | -3.7 | 14.36 |
| <i>u</i> <sub>754</sub> | Cl(33)...H(50) | 714.1(11) | 14.3(fixed) | -4.3 | 14.34 |
| <i>u</i> <sub>755</sub> | H(15)...H(24)  | 655.4(25) | 18.5(fixed) | -5.3 | 18.45 |
| <i>u</i> <sub>756</sub> | H(43)...H(55)  | 727.7(22) | 18.5(fixed) | -5.7 | 18.5  |

<sup>a</sup> Distances in pm. Values in parentheses are the standard deviations in terms of the last digits.

<sup>b</sup> Unrefined amplitudes of vibration were fixed at the values obtained using the B3LYP-D3/Def2TZVP force field.

**Table S9.** Least squares correlation matrix (x 100) for the GED refinement of conformer +77+.<sup>a</sup>

|                        | <i>p</i> <sub>18</sub> | <i>u</i> <sub>39</sub> | <i>u</i> <sub>143</sub> | <i>k</i> <sub>2</sub> |
|------------------------|------------------------|------------------------|-------------------------|-----------------------|
| <i>p</i> <sub>6</sub>  |                        |                        | -54                     |                       |
| <i>p</i> <sub>17</sub> | -52                    |                        |                         |                       |
| <i>u</i> <sub>37</sub> |                        | 54                     |                         |                       |
| <i>u</i> <sub>39</sub> |                        |                        |                         | 54                    |

<sup>a</sup> Only elements with absolute values  $\geq 50\%$  are shown; *k*<sub>2</sub> is a scale factor.**Table S10.** Least squares correlation matrix (x 100) for the GED refinement of conformer +51--.<sup>a</sup>

|                         | <i>p</i> <sub>3</sub> | <i>p</i> <sub>14</sub> | <i>p</i> <sub>18</sub> | <i>u</i> <sub>163</sub> | <i>k</i> <sub>2</sub> |
|-------------------------|-----------------------|------------------------|------------------------|-------------------------|-----------------------|
| <i>p</i> <sub>1</sub>   | 52                    | -51                    |                        |                         |                       |
| <i>p</i> <sub>2</sub>   |                       | -59                    |                        |                         |                       |
| <i>p</i> <sub>17</sub>  |                       |                        | -74                    |                         |                       |
| <i>u</i> <sub>40</sub>  |                       |                        |                        |                         | 55                    |
| <i>u</i> <sub>147</sub> |                       |                        |                        | 50                      |                       |

<sup>a</sup> Only elements with absolute values  $\geq 50\%$  are shown; *k*<sub>2</sub> is a scale factor.**Table S11.** Least squares correlation matrix (x 100) for the GED refinement of conformer -91(-).<sup>a</sup>

|                        | <i>p</i> <sub>18</sub> | <i>u</i> <sub>42</sub> | <i>k</i> <sub>2</sub> |
|------------------------|------------------------|------------------------|-----------------------|
| <i>p</i> <sub>17</sub> | -68                    |                        |                       |
| <i>u</i> <sub>37</sub> |                        | 53                     |                       |
| <i>u</i> <sub>42</sub> |                        | 100                    | 55                    |

<sup>a</sup> Only elements with absolute values  $\geq 50\%$  are shown; *k*<sub>2</sub> is a scale factor.

**Table S12.** Least squares correlation matrix (x 100) for the GED refinement of conformer +143-  
-.<sup>a</sup>

|                        | <i>p</i> <sub>25</sub> | <i>k</i> <sub>2</sub> |
|------------------------|------------------------|-----------------------|
| <i>p</i> <sub>23</sub> | 56                     |                       |
| <i>u</i> <sub>40</sub> |                        | 56                    |

<sup>a</sup> Only elements with absolute values  $\geq 50\%$  are shown; *k*<sub>2</sub> is a scale factor.

**Table S13.** Least squares correlation matrix (x 100) for the GED refinement of conformer +165+-.<sup>a</sup>

|                        | <i>k</i> <sub>2</sub> |
|------------------------|-----------------------|
| <i>u</i> <sub>41</sub> | 52                    |

<sup>a</sup> Only elements with absolute values  $\geq 50\%$  are shown; *k*<sub>2</sub> is a scale factor.

**Table S14.** Least squares correlation matrix (x 100) for the GED refinement of the combined model with the two conformers +77++&+51--.<sup>a</sup>

|                         | <i>p</i> <sub>14</sub> | <i>p</i> <sub>18</sub> | <i>u</i> <sub>81</sub> | <i>u</i> <sub>84</sub> | <i>u</i> <sub>311</sub> |
|-------------------------|------------------------|------------------------|------------------------|------------------------|-------------------------|
| <i>p</i> <sub>1</sub>   |                        |                        |                        | 52                     |                         |
| <i>p</i> <sub>2</sub>   | -50                    |                        |                        |                        |                         |
| <i>p</i> <sub>17</sub>  |                        | -63                    |                        |                        |                         |
| <i>u</i> <sub>73</sub>  |                        |                        | 52                     |                        |                         |
| <i>u</i> <sub>284</sub> |                        |                        |                        |                        | 54                      |

<sup>a</sup> Only elements with absolute values  $\geq 50\%$  are shown.

**Table S15.** Experimental coordinates from the GED refinement of conformer +77++.<sup>a</sup>

| Atom  | x      | y      | z      |
|-------|--------|--------|--------|
| P(1)  | 0.0    | 0.0    | 0.0    |
| Si(2) | 225.5  | 0.0    | 0.0    |
| C(3)  | -45.7  | 0.0    | 181.8  |
| C(4)  | -52.7  | -169.6 | -65.1  |
| Cl(5) | 288.5  | 156.2  | 115.0  |
| Cl(6) | 293.3  | 33.5   | -189.5 |
| Cl(7) | -325.5 | 162.6  | 72.0   |
| C(8)  | -69.2  | 144.6  | 226.4  |
| C(9)  | -47.1  | 72.0   | 280.1  |
| H(10) | -140.4 | -53.1  | 180.4  |
| C(11) | -22.3  | 195.4  | -196.2 |
| C(12) | -203.0 | -156.2 | -91.1  |
| C(13) | -28.3  | -286.6 | 30.6   |
| H(14) | 23.0   | 201.7  | 222.6  |
| H(15) | -106.7 | 147.9  | 328.3  |
| H(16) | -141.8 | 193.5  | 162.3  |
| H(17) | -2.4   | 76.9   | 378.9  |
| H(18) | -67.1  | 173.5  | 247.1  |
| H(19) | -142.1 | 20.1   | 288.7  |
| H(20) | -223.0 | -76.6  | -162.1 |
| H(21) | -243.5 | -248.4 | -131.7 |
| H(22) | -256.2 | -133.6 | 0.8    |
| H(23) | -77.0  | 294.9  | 55.5   |
| H(24) | -59.9  | -380.4 | -14.1  |
| H(25) | -83.7  | -273.1 | 123.0  |
| H(26) | -19.9  | -280.6 | -248.7 |
| H(27) | -16.3  | 109.1  | -261.8 |
| H(28) | -127.2 | 216.0  | -177.3 |

<sup>a</sup> Coordinates are in pm.

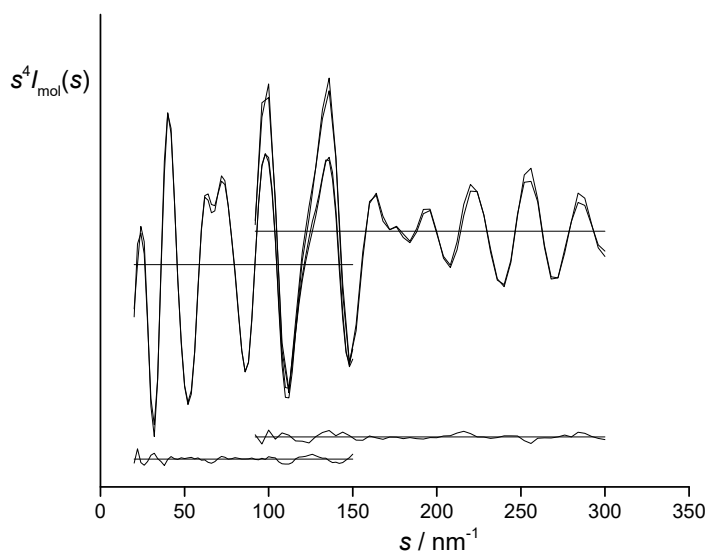

**Figure S1:** Experimental and final weighted difference (experimental – theoretical) molecular-scattering intensities for the conformer +77++.

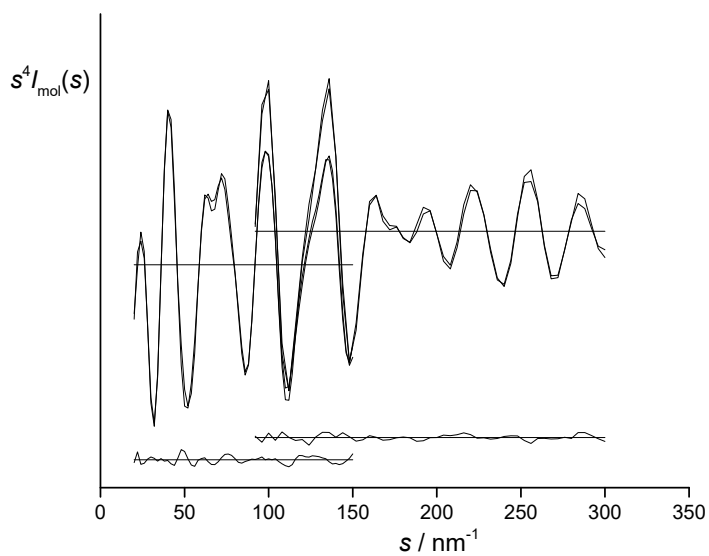

**Figure S2:** Experimental and final weighted difference (experimental – theoretical) molecular-scattering intensities for the conformer -91(-).

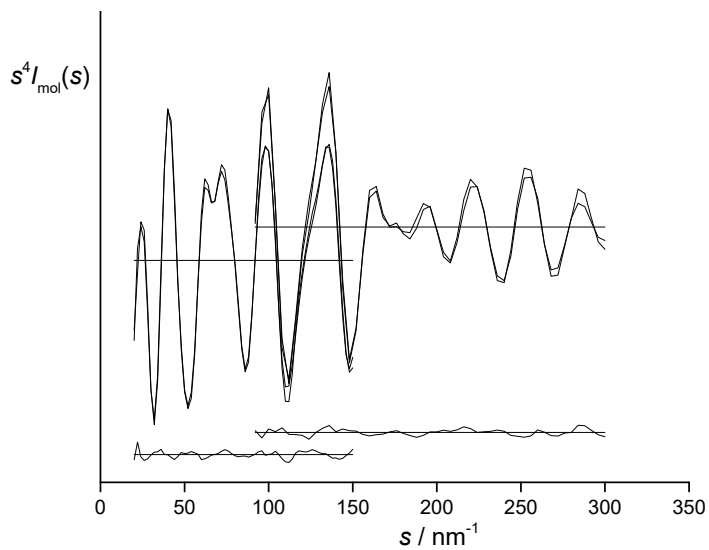

**Figure S3:** Experimental and final weighted difference (experimental – theoretical) molecular-scattering intensities for the conformer +165+-.

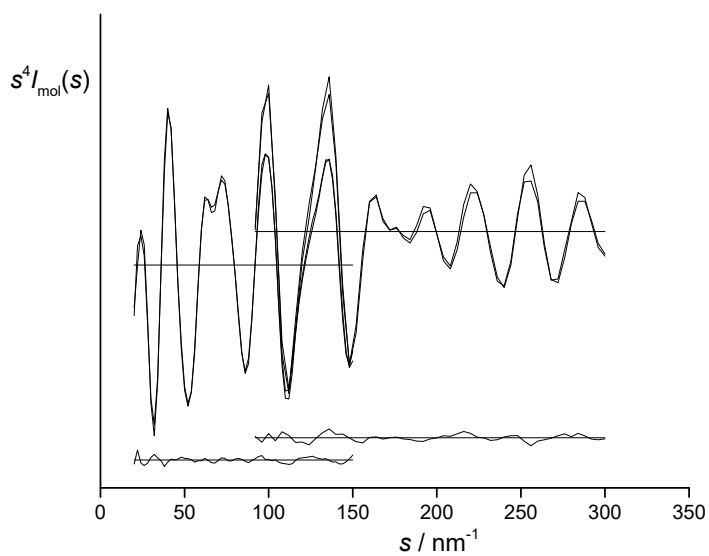

**Figure S4:** Experimental and final weighted difference (experimental – theoretical) molecular-scattering intensities for the conformer +51--.



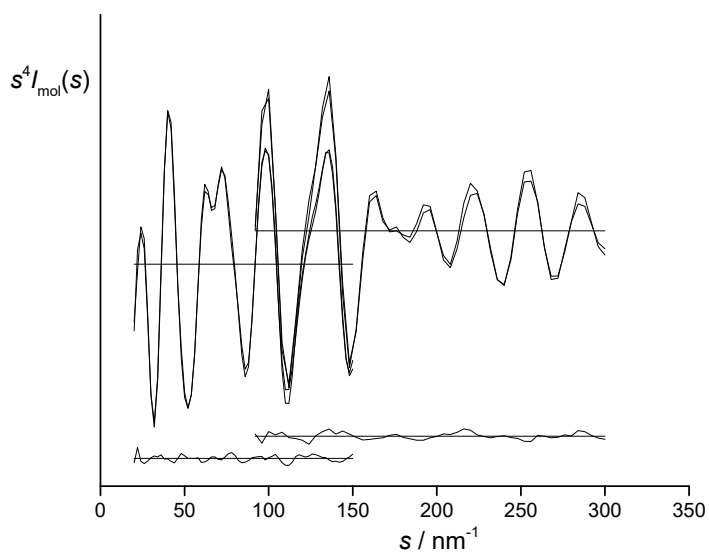

**Figure S5:** Experimental and final weighted difference (experimental – theoretical) molecular-scattering intensities for the conformer +143--.

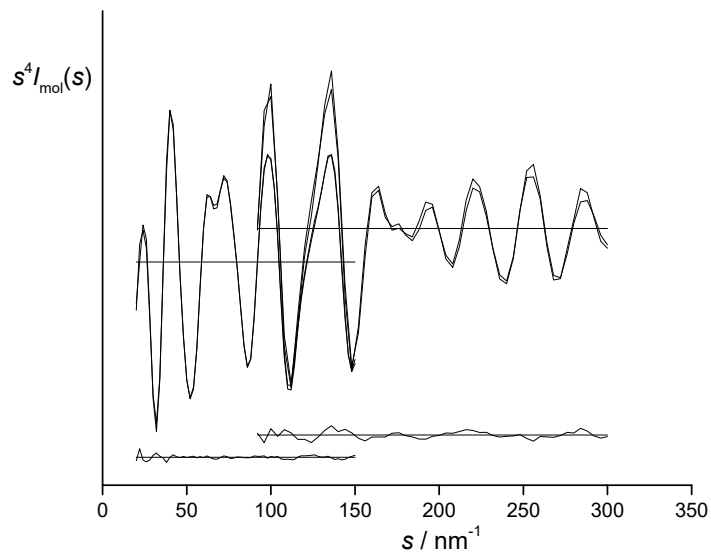

**Figure S6:** Experimental and final weighted difference (experimental – theoretical) molecular-scattering intensities for the combined model of +77++&+51--.

## Model Construction

The model for *iso*-propyl(*tert*-butyl)(trichlorosilyl)phosphine (**1**) was constructed using 31 independent geometric parameters. On the basis of the quantum chemical calculations, all bond length of the same type are quite similar and were assumed to be equal, apart from the P-C bond length. The distances used were the average bond lengths for the Si-Cl, P-Si, C-C and C-H distances ( $p_1, p_2, p_4, p_5$ ). For the P-C bond length an average ( $p_3$ ) of P(1)-C(3) and P(1)-C(4) and the difference ( $p_{31}$ ) were used to describe the distances where P(1)-C(3) is  $p_3 + p_{31}$  and P(1)-C(4) is  $p_3 - p_{31}$ .

The angles for the trichlorosilyl group  $\angle\text{Cl-Si-Cl}$ , the *iso*-propyl group  $\angle\text{H(10)-C(3)-C(9/8)}$  and the *tert*-butyl group  $\angle\text{C-C-C}$  were described using one individual parameters ( $p_6, p_{11}$ , and  $p_{13}$  respectively). The  $\angle\text{C-C-H}$  for each methyl group was described by one average parameter across both methyl-containing groups ( $p_{10}$ ). The two  $\angle\text{Si-P-C}$  were described using an average and the difference between this two angles ( $p_{14}$  and  $p_{15}$ ). The *iso*-propyl angles  $\angle\text{P-C-H(10)}$ ,  $\angle\text{P-C(3)-C(8/9)}$ ,  $\angle\text{C(8)-C(3)-C(9)}$  and the *tert*-butyl group angles  $\angle\text{P-C(4)-C(11/12/13)}$  were all described by one parameter each ( $p_7 - p_9, p_{12}$  and  $p_{20} - p_{22}$ ). Also the angles  $\angle\text{C-P-C}$  and  $\angle\text{P-Si-Cl(5/6/7)}$  were describe by one single parameter each ( $p_{15} - p_{19}$ ).

To define the torsion of the trichlorosilyl group the  $\phi\text{Cl(6)-Si(2)-P(1)-C(3)}$  dihedral angle ( $p_{23}$ ) was used. The torsions for the *iso*-propyl and *tert*-butyl groups were described by the dihedral angle  $\phi\text{C(9)-C(3)-P(1)-Si(2)}$  and  $\phi\text{C(11)-C(4)-P(1)-Si(2)}$  ( $p_{24}$  and  $p_{25}$ ). The torsion for each methyl group was simply taken from the central phosphorus atom ( $p_{26} - p_{30}$ ), where a positive value indicates clockwise rotation of the phosphorous atom relative to the hydrogen when viewed down the C(methyl)-C(group centre) bond.

In addition to the single conformers being refined individually, a mixed model refinement of +77++&+51-- was also undertaken. This utilised 53 independent parameters.

The bond lengths of Si-Cl, C-C and C-H are very similar for both conformers so one average distance for each parameter was used ( $p_1, p_4$  and  $p_5$ ). For the Si-P bond length the average ( $p_2$ ) of both conformers and the difference ( $p_{31}$ ) were necessary. To describe the P-C bond length an average of all C-P distances in both conformers was taken, the difference ( $p_{32}$ ) describes the *iso*-propyl P-C(3) bond length for both conformers. The difference ( $p_{33}$ ) was used to describe the *tert*-butyl P-C(4) bond length in +77++, the difference ( $p_{34}$ ) was used for the other conformer.

To describe the angles for the trichlorosilyl group  $\angle\text{Cl-Si-Cl}$  and  $\angle\text{P-Si-Cl(6)}$ , the *iso*-propyl group  $\angle\text{H(10)-C(3)-C(9/8)}$  and  $\angle\text{C-C-C}$ , the *tert*-butyl group  $\angle\text{C-C-C}$  were used one average parameter of both conformers ( $p_6, p_{17}, p_{11} - p_{13}$  respectively). For the  $\angle\text{C-C-H}$  angle each methyl group was described by one average parameter of both conformers and across both methyl-containing groups ( $p_{10}$ ). The average angle of both conformers and a difference was used to describe the isopropyl angles  $\angle\text{P-C-H(10)}$  ( $p_7, p_{35}$ ),  $\angle\text{P-C(3)-C(8)}$  ( $p_9, p_{37}$ ),  $\angle\text{P-C(3)-C(9)}$  ( $p_8, p_{36}$ ), the *tert*-butyl group angles  $\angle\text{P-C(4)-C(11)}$  ( $p_{21}, p_{42}$ ),  $\angle\text{P-C(4)-C(12)}$  ( $p_{22}, p_{43}$ ),  $\angle\text{P-C(4)-C(13)}$  ( $p_{20}, p_{41}$ ), the trichlorosilyl group angles  $\angle\text{P-Si-Cl(5)}$  ( $p_{18}, p_{41}$ ),  $\angle\text{P-Si-Cl(7)}$  ( $p_{19}, p_{42}$ ) and  $\angle\text{C-P-C}$  ( $p_{16}, p_{40}$ ). The two  $\angle\text{Si-P-C}$  angles of the trichlorosilyl group were described using an average of all  $\angle\text{Si-P-C}$  angles in both conformers ( $p_{14}$ ), the differences ( $p_{15}, p_{38}$ ) to describe +77++ plus difference ( $p_{39}$ ) to describe +51--. Furthermore each conformer had a unique set of torsion parameters.

## Structural Distortion

The steric features of the conformers of **1** can be examined by consideration of the twist and tilt angles. The distortion of the ligands can be determined by ascertaining their tilt angles. To determine these tilt angles, centroids of the ligands have to be introduced. For the trisilyl and *tert*-butyl groups, the centres of the triangles of the Cl(5)···Cl(5)···Cl(5) and C(11)···C(12)···C(13) atoms are used to create V or W, respectively. For the construction of centroid X of the *iso*-propyl group, a point R along the C(3)–H(10) vector at a distance equivalent to the C–C distance was introduced, with the C(8)···C(9)···R triangle defining the centroid. In the same way, vectors at a distance the same as the Si–P bond length were introduced for P–C(3) and P–C(4) (auxiliary points S and T). The triangle Si···S···T gives the centroid U. The extension of the U–P vector defines the position of the lone electron pair Z on the phosphorus atom. A visualisation of the created centroids for conformer +77++ is shown in Figure S7.

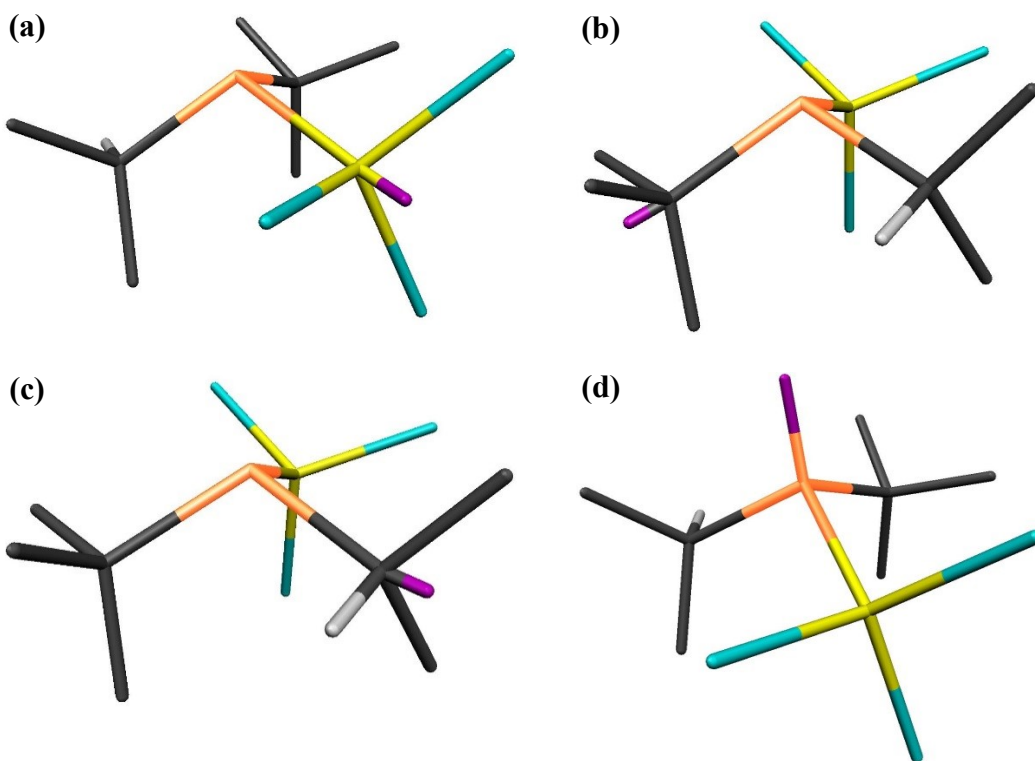

**Figure S7.** Representation of the constructed centroids (a) V for the SiCl<sub>3</sub> group, (b) W for the *tert*-butyl group, (c) X for the *iso*-propyl group and (D) Z the lone pair of electrons on the phosphorus atom. The centroids have been coloured magenta for clarity.

Having introduced the centroids, the axial tilt and the directional component can now be examined. A positive axial tilt value indicates that the group is tilted towards the lone pair of the phosphorus atom. A positive directional tilt value indicates that the torsion down Z–P–C(3)–X/ Z–P–C(4)–W and Z–P–Si–V is clockwise (positive). The axial tilt angle for the trichlorosilyl group was determined by measuring the angle between Si–P–V. C(4)–P–W describes the tilt for the *tert*-butyl group and the C(3)–P–X angle describes the axial tilt of the *iso*-propyl group. The deviation

between the perfect extensions for the centroid of each ligand was determined by measuring the S-Si-V, T-C(4)-W and U-C(3)-X angles, where S, T and U represent the extension of the P-C or P-Si bonds as shown in Figure S8. An overview of the tilt angles for the refined conformer +77++ and all the computed conformers of **1** are given in Table S16.

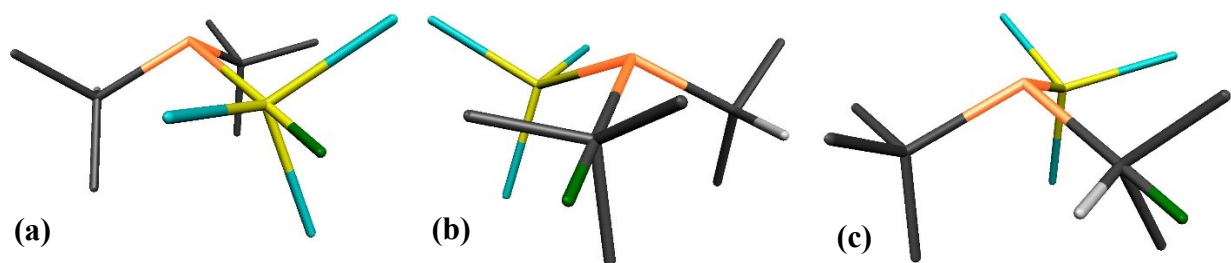

**Figure S8.** Representation of the constructed extensions (a) S for the  $\text{SiCl}_3$  group, (b) T for the *tert*-butyl group and (c) U for the *iso*-propyl group. The vector extensions have been coloured green for clarity.

**Table S16.** Torsions and directional components for tilt angles in the five conformers of **1** computed at the B3LYP-D3/Def2TZVP level as well as the refined lowest energy structure (**R**). All values are given in degrees.

| <b>Conformer</b>                                               | <b>+77++ R</b> | <b>+77++</b> | <b>+51--</b> | <b>-91(-)</b> | <b>+143--</b> | <b>+165+-</b> |
|----------------------------------------------------------------|----------------|--------------|--------------|---------------|---------------|---------------|
| <b>Tilt</b>                                                    |                |              |              |               |               |               |
| P-Si-V                                                         | 1.7            | 1.7          | 1.7          | 1.7           | 1.3           | 1.2           |
| P-C(4)-W                                                       | 1.1            | 1.5          | 1.6          | 1.6           | 1.3           | 1.3           |
| P-C(3)-X                                                       | 3.4            | 3.1          | 2.9          | 2.9           | 4.7           | 4.6           |
| <b>Torsion angle from the perfectly staggered conformation</b> |                |              |              |               |               |               |
| lp-P-Si-Cl                                                     | 10.5           | 11.5         | -7.7         | -0.3          | -12.8         | -9.5          |
| lp-P-C-C tBu                                                   | 27.0           | 24.7         | -12.0        | -4.9          | -5.3          | 31.7          |
| lp-P-C-H iPr                                                   | 12.7           | 15.6         | -11.2        | -29.1         | -37.1         | -14.8         |
| <b>Angle between lone pair and central atom of the ligand</b>  |                |              |              |               |               |               |
| lp-P-Si                                                        | 125.4          | 124.0        | 125.0        | 127.8         | 125.7         | 125.9         |
| lp-P-C(4)                                                      | 106.5          | 107.0        | 106.8        | 102.5         | 108.7         | 106.9         |
| lp-P-C(3)                                                      | 107.8          | 107.9        | 105.8        | 108.4         | 108.9         | 111.4         |
| <b>Tilt direction of the ligand</b>                            |                |              |              |               |               |               |
| lp-P-Si-V                                                      | 29.1           | 16.7         | -4.5         | 24.0          | -0.3          | 30.5          |
| lp-P-C-W tBu                                                   | 4.8            | 2.9          | -2.0         | 4.3           | -6.6          | 12.2          |
| lp-P-C-X iPr                                                   | -88.3          | -80.3        | -102.6       | 62.5          | -29.8         | -11.9         |
